## Evaluating the data quality of iNaturalist termite records

Hartwig H. Hochmair<sup>1,2\*</sup>, Rudolf H. Scheffrahn<sup>1,3</sup>, Mathieu Basille<sup>1,4</sup>, Matthew Boone<sup>1,4</sup>

(1) University of Florida, Fort Lauderdale Research and Education Center

3205 College Avenue, Davie, Florida, 33314

(2) University of Florida, School of Forest Resources and Conservation

(3) University of Florida, Department of Entomology and Nematology

(4) University of Florida, Department of Wildlife Ecology and Conservation

\* Corresponding author

E-mail: [hhochmair@ufl.edu](mailto:hhochmair@ufl.edu) (HH)

## 1 **Abstract**

2 Citizen science (CS) contributes to the combined knowledge about species distributions, which is  
3 a critical foundation in the studies of invasive species, biological conservation, and response to climatic  
4 change. In this study, we assessed the value of CS for termites worldwide. First, we compared the  
5 abundance and species diversity of geo-tagged termite records in iNaturalist to that of the University of  
6 Florida termite collection (UFTC) and the Global Biodiversity Information Facility (GBIF). Second, we  
7 quantified how the combination of these data sources affected the number of genera that satisfy data  
8 requirements for ecological niche modeling. Third, we assessed the taxonomic correctness of iNaturalist  
9 termite records in the Americas at the genus and family level through expert review based on photo  
10 identification. Results showed that iNaturalist records were less abundant than those in UFTC and in  
11 GBIF, although they complemented the latter two in selected world regions. A combination of GBIF and  
12 UFTC led to a significant increase in the number of termite genera satisfying the abundance criterion for  
13 niche modeling compared to either of those two sources alone, whereas adding iNaturalist observations as  
14 a third source only had a moderate effect on the number of termite genera satisfying that criterion.  
15 Although research grade observations in iNaturalist require a community-supported and agreed upon ID  
16 below the family taxonomic rank, our results indicated that iNaturalist data do not exhibit a higher  
17 taxonomic classification accuracy when they are designated research grade. This means that non-research  
18 grade observations can be used to more completely map the presence of termite locations in certain  
19 geographic locations without significantly jeopardizing data quality. We concluded that CS termite  
20 observation records can, to some extent, complement expert termite collections in terms of geographic  
21 coverage and species diversity. Based on recent data contribution patterns in CS data, the role of CS  
22 termite contributions is expected to grow significantly in the near future.

23

## 24 **Introduction**

25           Termites are destructive insect pests that annually cause billions of dollars in damage and losses.  
26 These costs, based on insecticide sales figures, were estimated to be \$22 billion worldwide in 1999 [1].  
27 Using 2010 sales data, the estimated global economic impact of termites has increased to \$40 billion, with  
28 subterranean termites accounting for about 80 % of the costs [2]. Understanding spatio-temporal patterns  
29 of termite distributions is therefore necessary for the implementation of effective pest control strategies.  
30 Open-access databases provide unprecedented access to biodiversity data in the form of species  
31 occurrences worldwide. Biodiversity databases vary in composition of data sources, and include expert  
32 surveys, georeferenced museum collection data, published literature reviews, and contributions from  
33 recreational naturalists. Specifically, the continued advancement of information and communication  
34 technology, including the emergence of the Web 2.0 and the development of location-aware mobile  
35 technologies, sensors, and cameras have greatly increased the capacity of how citizens can contribute to  
36 Citizen Science (CS) projects [3]. Citizens have become an important source of geographic information,  
37 even in domains that had until recently been the exclusive realm of authoritative agencies [4]. However,  
38 because of their cryptic nature and small size, termite specimens retrieved from their substrata or during  
39 dispersal flights often require expert knowledge [5], which renders data collection and identification  
40 particularly challenging. Previous research has demonstrated that CS adds scientific value to conventional  
41 science in various aspects, including greater geographic scales and temporal range, improved field  
42 detection, and detection of unusual occurrences [3]. It also offers an additional way to monitor Essential  
43 Biodiversity Variables (EBVs) [6] that cannot be remotely sensed, such as taxonomic diversity or  
44 migratory behavior. Furthermore, CS adds other benefits to conservation efforts, natural resource  
45 management, and environmental protection through public engagement [3]. The development of spatial  
46 statistical methods has led to the frequent use of open-access biodiversity databases in species distribution  
47 modeling (SDM) [7], which may be used for a variety of purposes, such as identifying species diversity  
48 hotspots [8] and predicting potential ranges of invasive species [9], in addition to forecasting effects of

49 climate change on biodiversity [10]. Consistent survey coverage along time, space, and environment is  
50 required to answer different ecological and evolutionary questions and to develop accurate SDMs [11].

51 iNaturalist is a prominent CS platform for documenting species observations across the world.  
52 Participants submit media (pictures, video, or audio) of biological sightings to the iNaturalist data portal  
53 that are then identified online by the iNaturalist community [12]. Despite their strong contributions to  
54 publicly available data sets, CS based geo-data collections oftentimes suffer from geographic and user  
55 selection bias caused by the opportunistic nature of the data collection process [13] compared to data from  
56 administrative agencies [14].

57 While there is no reference data collection available that captures the presence of termites in all  
58 parts of the world, it is nevertheless possible to compare various features (e.g. number of sightings, spatial  
59 coverage, species diversity) between different online data portals and expert collections. The first task of  
60 this study was thus to compare global record numbers, spatial coverage, and species diversity for termites  
61 between iNaturalist, the University of Florida termite collection (UFTC) and Global Biodiversity  
62 Information Facility (GBIF). The latter data source is currently the largest occurrence data portal,  
63 combining data from many sources of different countries, scientific institutions and CS platforms. Since  
64 iNaturalist is one the sources feeding into the GBIF platform, its contribution for termite data records in  
65 GBIF can be quantified. The second task was to assess how many genera recorded in individual or  
66 combined data sources, respectively, satisfy data requirements for ecological niche modeling. The third  
67 task was to analyze the taxonomic correctness at the genus and family level of termite records on  
68 iNaturalist through photo identification, and to examine if iNaturalist research grade records are more  
69 likely to have fewer taxonomic misclassifications than records of other data quality assessment levels.

70

71

## 72 **Materials and methods**

### 73 **UF termite collection**

74           The UFTC at the Fort Lauderdale Research and Education Center in Davie, Florida, was  
75 established in 1985. An online repository [15] hosts over 38,000 termite samples with official species  
76 names from collections that are preserved in 85 % ethanol. Samples were primarily collected by  
77 operatives in the pest control industry, property owners, and academics and submitted to the second  
78 author (RHS) for identification. The collection database records describe genus and species, geographic  
79 latitude and longitude, collection date, and type of structure infested. It contains records from all  
80 continents, although the geographic focus is on North and South America. Worldwide, the collection  
81 dates range between 1915 and 2019. As of mid 2019 the UFTC contains samples from over 800 unique  
82 bionomials.

### 83 **iNaturalist**

84           iNaturalist was created in 2008 by graduate students at the University of California Berkley, and  
85 is currently funded by the California Academy of Sciences (starting 2014) and the National Geographic  
86 Society (starting 2017). Observations from iNaturalist frequently include date, time, and a media record  
87 of the observation. Any media records are then identified by the online community. As of 2019,  
88 iNaturalist contained over 24 million biological observations from users around the world. Termite  
89 records were downloaded from iNaturalist on 4/16/2019 using the R [16] package “rinat” [17] and the  
90 query ‘taxon\_name = “Termites” ’. This returns all observations of the epifamily Termitidae (formerly  
91 known as Infraorder Isoptera). After removal of records with missing or invalid coordinates a total set of  
92 6078 termite observations remained worldwide. iNaturalist identifies the reliability of observations  
93 through a process called data quality assessment (DQA) [18]. The DQA addresses to some extent all  
94 elements of standardized principles for describing the data quality for geographic data [19], which include  
95 completeness, logical consistency, positional accuracy, temporal accuracy, and thematic accuracy. The

96 DQA categorizes contributed data into three categories, which are “Needs ID”, “Research Grade” and  
97 “Casual”. If an observation satisfies a set of specific technical criteria (i.e. having a date, geographic  
98 coordinates, photos or sounds, and not being a captive or cultivated organism), this observation is  
99 considered verifiable, and is labeled “Needs ID”, otherwise it is called “Casual”. An observation reaches  
100 research grade status (the highest level) if the community agrees at a level lower than family, which is  
101 when more than two thirds of two identifiers or more agree on a taxon. From the extracted sample of 6078  
102 termite observations, the vast majority are still “Needs ID” observations (5161 records, 84.9 %), and only  
103 785 (12.9 %) are research grade, with the highest proportion (33.9 %) in South Africa. That latter fact can  
104 be partially attributed to the more than 300 termite contributions in that region by user Tony Rebelo, a  
105 conservation biologist from the South African National Biodiversity Institute. The remaining records of  
106 the worldwide collection on iNaturalist are of “Casual” quality with 132 records (2.2 %). These numbers  
107 illustrate that using research grade only records for any type of spatial analysis seriously affects data  
108 abundance in difficult to ID taxa.

109 By default, all photos uploaded to iNaturalist are released under a Creative Commons (CC)  
110 Attribution-Non-Commercial (CC-BY-NC) license, which allows free use of the data for non-commercial  
111 purposes, as long as the owner is cited. However, users can revoke this license entirely or chose from  
112 different versions of the CC license, such as CC0 (essentially public domain, under which data are made  
113 available for any use without restriction), or CC BY (under which data are made available for any use,  
114 including commercial purposes, provided that attribution is given appropriately for the sources of data  
115 used, in the manner specified by the owner).

## 116 **GBIF**

117 The GBIF platform is an inter-governmental, global research infrastructure that facilitates the  
118 sharing, discovery and access to primary biodiversity data [20]. It provides free access to digitized  
119 biological data from different sources (e.g. museum collections, survey programs) as a result of  
120 collaborations between data providers and taxonomists across many institutions. As of fall 2019, GBIF

121 facilitated access to over 1.35 billion records per the GBIF website. It gathers data records from more  
122 than 800 institutions worldwide, where CS programs represent about 27% of total GBIF records for  
123 insects [12]. Data publishers can use a variety of tools, protocols and standards to publish primary  
124 occurrence records to GBIF.

125         Access to records on GBIF can be achieved through bulk download from the GBIF website,  
126 through web services, or through third-party libraries, such as the R “*rgbif*” package [21]. For this study, a  
127 GBIF bulk download for geo-tagged records including human observation, material sample or specimen  
128 of the Blattodea order was conducted on 4/18/19, followed by application of the filter for the nine termite  
129 families of the epifamily Termitoidae. This process resulted in 37,061 records worldwide. This dataset  
130 contained 443 contributions from three CS programs (iNaturalist:  $n = 436$ , naturgucker:  $n = 4$ , natusfera:  
131  $n = 3$ ). Besides this, 35,520 records stem from non-CS sources and 1,098 records lack a data source  
132 description. Overall, the share of CS based contributions of termite data to GBIF is small (~1.2 %). A  
133 large bulk of GBIF termite data comes from a single contributor, namely the Commonwealth Scientific  
134 and Industrial Research Organisation (CSIRO) with 14,134 records, almost all of which were acquired in  
135 Australia.

136         All occurrence records indexed on GBIF need to satisfy certain data quality criteria before being  
137 included in the platform [22]. One of these criteria is that records need to be associated with one of the  
138 three CC licenses mentioned before (CC0, CC BY, CC BY-NC), and be of research grade quality. For  
139 example, from among the set of 785 worldwide iNaturalist research grade termite records, only 437  
140 observations have one of these three CC licenses. This explains that the number iNaturalist termite  
141 records extracted through GBIF ( $n = 436$ ) matches (closely) that for records downloaded directly from  
142 iNaturalist when the CC and research grade filters are applied ( $n = 437$ ). The difference of one record  
143 stems from the fact that GBIF misses the most recent iNaturalist termite record (dated 4/13/2019) that  
144 may not have been discovered in the latest crawling process.

## 145 **Mapping termite record distribution**

146 To analyze the distribution of termite records we imported the cleaned data sets into R 3.6.1. We  
147 created 2.5° hexagon grid cells for mapping distribution using the `st_make_grid` function and summarized  
148 the number of termite observations in each data set using the `sf_intersect` function in the SF package [23].

## 149 **Data suitability for niche modeling**

150 Ecological niche modeling techniques, such as Maxent, require a sufficient volume of geo-  
151 referenced occurrence records with temporal attributes [20]. The recommended minimum number of  
152 distinct data-points for niche modeling analysis falls between 10 and 20 [24]. We determined the number  
153 termite genera that feature enough observations for ecological niche modeling in any of the analyzed data  
154 sources and their combinations, respectively. For this purpose, the surface of the Earth is subdivided into  
155 0.1 degree grid cells [20]. Next, the number of those termite genera is determined which are present in at  
156 least 10, 20, and 50 distinct 0.1 grid cells around the globe, respectively. Only records with a time stamp  
157 containing at least month and year are considered for this purpose.

## 158 **Taxon correctness of iNaturalist termite records**

159 To determine taxon correctness, we performed a manual review of 2201 iNaturalist records in the  
160 Americas that have been named at the family rank or lower. The correctness of order, family, subfamily  
161 and genus entries for these records is evaluated based on manual inspection of community provided  
162 photographs conducted by RHS. The analysis shows how frequently designations at these different  
163 taxonomic ranks were misclassified. The choice to conduct the evaluation at the genus rank or higher is  
164 because species are often hard to recognize from photographs. Such effort would require samples to be  
165 viewed under a microscope. Furthermore, on a subset of 1792 iNaturalist records that were identified at  
166 the genus or species taxonomic rank, we determined if taxon correctness of genus and family level  
167 depended on research grade status of the observations using a randomization test for contingency tables.  
168 This limitation to genus and species taxonomic rank was chosen since, in order to reach research grade



169 status, an observation in iNaturalist must be below family rank. The geographic focus of the termite  
170 taxonomic accuracy assessment was restricted to the Americas because of taxonomic expertise of RHS  
171 for termites in that part of the world.

## 172 **Results**

### 173 **Data abundance**

174 Contributions to GBIF, iNaturalist, and the UFTC between 1920 and 2018 showed contrasted  
175 results (Fig 1). Annual contributions to the UFTC grew steadily starting from the mid 1980's when RHS  
176 established the database, began annual field excursions in central and South America for data collection,  
177 and promoted the collection in the pest control industry. After peaking in 2013, the number of annual  
178 contributions was surpassed by iNaturalist in 2016. Unlike other submission sources, GBIF expert  
179 contributions were sporadic throughout our time period with punctuated uploads between 1995-1999 and  
180 2010-2014. The spike in observations from 1995-1999 was primarily associated with 6489 preserved  
181 specimens locations from the Yucatan peninsula in Mexico in 1997. These contributions were  
182 administered by the Comisión Nacional para el Conocimiento y Uso de la Biodiversidad (MBM-  
183 UACAM). They were collected over the entire year and taken at multiple locations in natural areas. This  
184 suggests that the source of this data was actual field data from concerted collection efforts rather than  
185 bulk upload from archived data. Another notable peak in expert GBIF contributions fell within the 2010-  
186 2014 time range. It was caused by 7249 contributions of the Laboratory of Applied Entomology of the  
187 University of Lome which were collected in rural areas of northern Ghana and Togo within  
188 approximately three weeks in August 2013. For the GBIF annual charts, it must be noted that over 4500  
189 records (specimen collections) lacked a contribution year, and that these were therefore missing for the  
190 GBIF charts but present in contribution maps. The GBIF charts make clear that CS based contributions to  
191 GBIF only started in recent years and make up only a small fraction of all GBIF data as of now. The  
192 increase in contributions from iNaturalist follows the website's inception in 2008 and shows that the bulk

193 of data contributions is of non-research grade. This highlights the importance of assessing the taxonomic  
194 classification accuracy for those kind of records.

195

196 **Fig 1. 5-year counts of termite records contributed to GBIF, iNaturalist, and the UFTC**  
197 **across the globe between 1920 and 2018.**

198 Australia (including Oceania) was the continent with most expert (non-CS) contributions to  
199 GBIF, which stem primarily from CSIRO records mentioned above (Table 1). The iNaturalist community  
200 contributed termite observations most actively in North America. Since GBIF CS data stem primarily  
201 from iNaturalist, this also resulted in GBIF CS data abundance being highest in North America. Most data  
202 records in the UFTC can be found in North America, followed by South America due to frequent field  
203 expeditions by RHS.

204

205 **Table 1. Number of termite records in GBIF, iNaturalist, and the UFTC, split by continent.**

206 Highlighted cells show the continent with the highest collection count per data category.

| Continent     | GBIF ( <i>n</i> = 37061) |     |         | iNaturalist ( <i>n</i> = 6078) |              | UFTC ( <i>n</i> = 38558) |
|---------------|--------------------------|-----|---------|--------------------------------|--------------|--------------------------|
|               | Expert                   | CS  | Unknown | Research                       | Non-research |                          |
| Africa        | 7329                     | 111 | 27      | 263                            | 677          | 2607                     |
| Asia          | 320                      | 53  | 457     | 81                             | 417          | 267                      |
| Australia     | 16047                    | 15  | 283     | 18                             | 337          | 294                      |
| Europe        | 489                      | 15  | 138     | 24                             | 73           | 24                       |
| North America | 10250                    | 247 | 48      | 394                            | 3441         | 27272                    |
| South America | 1085                     | 2   | 145     | 5                              | 348          | 8094                     |
| Total         | 35520                    | 443 | 1098    | 785                            | 5293         | 38558                    |

207

208 Visual inspection of worldwide distribution maps suggests that GBIF termite records were most  
209 abundant in Australia (Fig 2a), whereas iNaturalist and UFTC records were mostly found in North  
210 America (Fig2b and c).

211

212 **Fig 2: Geographic distribution of termite records in GBIF (a), iNaturalist (b), and the**  
213 **UFTC (c).**

214 The world map in Fig 3a reveals that CS (all sources, including both research and non-research  
215 grade iNaturalist records) collected data cover significant observation gaps of expert data in most  
216 continents, including regions, such as Southern and Eastern Africa, Southern Europe, India, South-East  
217 Asia and New Zealand. This means that CS data are important for the improvement of worldwide termite  
218 distribution models.

219 The geographic distribution of termite collection localities for iNaturalist in Fig 3b clearly  
220 demonstrates that presence of these data in most world regions through this CS source relies on non-  
221 research grade observations (Casual or Needs ID). Comparison to Fig a also shows that several world  
222 regions that are not covered by expert users are covered by casual observations in iNaturalist, e.g. in  
223 Southern Europe, coastal Brazil, India, or South-East Asia. Given that no difference in termite  
224 classification accuracy between iNaturalist research grade and non-research grade observations could be  
225 found, it is suggested that considering non-research grade CS observations, especially in combination  
226 with expert databases, helps to paint a more comprehensive and clearer picture of global biodiversity than  
227 expert or research-grade observations only.

228

229 **Fig 3: Coverage of termite observations from the three analyzed sources separated into CS**  
230 **based and expert based (a), and coverage of iNaturalist records alone, separated by observation**  
231 **quality (b).**

## 232 **Species diversity**

233 Cumulative species diversity over the years contrasted expert observations (UFTC, GBIF without  
234 CS sources), from CS sources (i.e., GBIF CS contributions and iNaturalist records regardless of quality  
235 grade) (Fig 4a). In any of the sources only a small fraction of termite species was collected each year

236 compared to the total of 655 species estimated to be established in the Americas alone [25]. This means  
237 that annual termite collection activities miss a large portion of termite species and their spatial coverage.  
238 However, since termites spread slowly, i.e. typically less than 100 m/year except for anthropogenic  
239 dispersal [26], this problem can be somewhat mitigated by aggregating infestation records over a multi-  
240 year time period. Although the total number of records was comparable between GBIF and UFTC  
241 globally (compare Table 1), global species diversity was more pronounced in UFTC. Since UFTC  
242 contains more than three times the number of records for North and South America than GBIF, this  
243 difference in species diversity between these two databases becomes even more pronounced for the  
244 Americas (Fig 4b).

245

246 **Fig 4: Cumulative number of termite species mapped in the UFTC, in GBIF based on**  
247 **expert (non-CS) observations and CS observations across the world (a) and in the Americas (b).**

## 248 **Data suitability for niche modeling**

249 The number of genera satisfying data requirements for niche modelling (may it be 10, 20, or 50  
250 distinct cells) was largest for the UFTC, somewhat closely followed by GBIF, which in this analysis  
251 included both expert and CS data (Fig 5). Research-grade CS data played only a minor role in GBIF  
252 termite data abundance (Fig 1). As opposed to UFTC and GBIF, the iNaturalist platform (including both  
253 research grade and non-research grade) satisfied niche modeling data requirements for only few genera.  
254 Adding non-research grade observations from iNaturalist to GBIF (which itself already includes research-  
255 grade iNaturalist data) only moderately increased the number of genera meeting modeling criteria, namely  
256 by up to 14.3% for  $\geq 50$  distinct grid cells. As opposed to this, GBIF and UFTC appeared very  
257 complementary. A combination of these two most comprehensive sources, mostly consisting of expert  
258 and/or museum collections, led to a substantial increase in the number of termite genera suitable for niche  
259 modelling compared to either of those two sources alone (Fig 5). More specifically, complementing GBIF

260 with UFTC data led to a stronger relative increase in genera numbers (between 78.6% and 95.0%) than  
261 complementing UFTC with GBIF data (increase between 39.3% and 78.6%). This illustrates the current  
262 dominant role of UFTC as a global termite inventory. Adding iNaturalist data as a third source to the  
263 UFTC +GBIF combination increases the number of termite genera suitable for niche modelling only  
264 slightly, namely by 1.8% (for  $\geq 10$  cells), 0.0% (for  $\geq 20$  cells), and 8.0% (for  $\geq 50$  cells), respectively.

265

266 **Fig 5: Number of termite genera covering  $\geq 10$ ,  $\geq 20$ , and  $\geq 50$  distinct 0.1 degree cells for**  
267 **individual data sources and one combination.**

## 268 **Taxon correctness of iNaturalist termite records**

269 For the expert review of termite classification in iNaturalist, a subset of 2201 records that had a  
270 taxonomic description at the family level or lower was extracted (200 observations were identified at the  
271 family level, 151 at the subfamily level, 781 at the genus level, and 1069 at the species level).

272 The five genera of termites reported in iNaturalist which accounted for more than 72% of the  
273 observations (1597/2201) are those that are out in the open (not hidden in structures) and can thus be  
274 visually detected. These include species of genera that are very common (*Reticulitermes*,  $n = 939$ ), very  
275 large (*Zootermopsis*,  $n = 351$ ), build conspicuous nests (*Nasutitermes*,  $n = 187$ ), or forage on the surface  
276 of the soil (*Gnathamitermes*,  $n = 77$ , and *Tenuirostritermes*,  $n = 43$ ) (Table 2). All other genera had fewer  
277 than 40 observations, and many had 1 to 5 only. 351 records lack genus information but contain family or  
278 subfamily rank information only. Many photographs of the analyzed sample include the winged images  
279 which emerge from their cryptic nests during dispersal flights.

280

281

**Table 2. Termite genera of analyzed iNaturalist records for the Americas.**

| <b>Genus</b>           | <b>Count</b> | <b>Genus</b>             | <b>Count</b> |
|------------------------|--------------|--------------------------|--------------|
| <i>Amitermes</i>       | 10           | <i>Neotermes</i>         | 3            |
| <i>Anoplotermes</i>    | 12           | <i>Paraneotermes</i>     | 1            |
| <i>Bulbitermes</i>     | 5            | <i>Porotermes</i>        | 3            |
| <i>Coptotermes</i>     | 37           | <i>Procornitermes</i>    | 1            |
| <i>Cornitermes</i>     | 1            | <i>Pterotermes</i>       | 1            |
| <i>Cortaritermes</i>   | 1            | <i>Reticulitermes</i>    | 939          |
| <i>Cryptotermes</i>    | 3            | <i>Rhinotermes</i>       | 1            |
| <i>Gnathamitermes</i>  | 77           | <i>Rhynchotermes</i>     | 4            |
| <i>Heterotermes</i>    | 6            | <i>Silvestritermes</i>   | 1            |
| <i>Incisitermes</i>    | 131          | <i>Syntermes</i>         | 24           |
| <i>Kalotermes</i>      | 3            | <i>Tenuirostritermes</i> | 43           |
| <i>Microcerotermes</i> | 2            | <i>Termes</i>            | 1            |
| <i>Nasutitermes</i>    | 187          | <i>Velocitermes</i>      | 1            |
| <i>Neocapritermes</i>  | 1            | <i>Zootermopsis</i>      | 351          |

282

283 The 2201 iNaturalist records fall into five families, which are Archotermopsidae ( $n = 351$ ),  
284 Kalotermitidae ( $n = 198$ ), Rhinotermitidae ( $n = 1045$ ), Stolotermitidae ( $n = 4$ ), and Termitidae ( $n = 603$ ).

285 Most records were still in need of identification (Needs\_ID quality, 79.9 %), while only 18.1 %  
286 were research grade, the remaining 2.0 % being casual observations.

287 68 records which did not allow for accurate identification (38 records with poor image quality,  
288 and 30 records without a picture), were removed.

289 Taxonomic accuracy was generally high (Table 3). That is, out of 1026 observations that were  
290 identified at the species rank in iNaturalist, 39 had an incorrect genus, 25 an incorrect family, and six an  
291 incorrect order, accounting for a total of 6.8 % observations that needed correction. Out of a sample of  
292 1792 records for the Americas that were named at the species or genus taxonomic rank, only 78 records  
293 (4.4 %) had an incorrect genus. Conversely, irrespective of the level at which observations were  
294 identified, only 54 records out of 2133 (2.5 %) showed an incorrect family designation, and only eight  
295 records (0.4 %) showed an incorrect order, where ants or flies were mistaken as termites.

296

297 **Table 3: Number of observations at different taxonomic levels and the number of**  
 298 **corrections.**

| Taxon        | # Observations | Corrections: Count (%) |           |           |          |
|--------------|----------------|------------------------|-----------|-----------|----------|
|              |                | Genus                  | Subfamily | Family    | Order    |
| Species      | 1026           | 39 (3.8)               | - (-)     | 25 (2.4)  | 6 (0.6)  |
| Genus        | 766            | 39 (5.1)               | - (-)     | 7 (0.9)   | 0 (0)    |
| Subfamily    | 145            | - (-)                  | 1 (0.7)   | 2 (1.4)   | 1 (0.7)  |
| Family       | 196            | - (-)                  | - (-)     | 20 (10.2) | 1 (0.5)  |
| <b>Total</b> | <b>2133</b>    | <b>78</b>              | <b>4</b>  | <b>54</b> | <b>8</b> |

299  
 300 The misclassification rates were similar between termite families (Fig 6). 13 out of 192 records  
 301 (3.6 %) classified as Kalotermitidae were actually coming from other families. Corresponding numbers  
 302 were 16 out of 1010 (1.6 %) for Rhinotermitidae, 12 out of 584 (2.1 %) for Termitidae, and 13 out of 343  
 303 (3.8 %) for Archotermopsidae records.

304  
 305 **Fig 6: Corrections (right side) of incorrect family classifications (left side) for 54 termite**  
 306 **records.** Band-width is proportional to number of corrected observations. All four Stolotermitidae records  
 307 had correct family names, which is why this family is not shown on the left side.

308 The same analysis at the genus level showed a more contrasted situation (Fig 7). Sixteen out of  
 309 the 35 records (45.7 %) identified as genus *Coptotermes* had an incorrect genus, followed by 13/343  
 310 (3.8 %) for *Zootermopsis*, 11/906 (1.2 %) for *Reticulitermes*, and 10/906 (1.1 %) for *Incisitermes*. The  
 311 high misclassification rate of the prior can likely be attributed to the fact that exotic species like  
 312 *Coptotermes* are new to observers who are more familiar with native taxa like *Reticulitermes*.  
 313 Superficially, both look similar.

314  
 315 **Fig 7: Corrections (right side) of 78 iNaturalist termite records with incorrect genus**  
 316 **designations (left side).**

317 Based on observation and correction counts from Table 4, a permutation independence test with  
318 2000 randomizations showed that there was no significant association between DQA and the likelihood  
319 for a genus correction,  $X^2 = 1.92$ ,  $p = 0.21$ , and no significant association between DQA and the  
320 likelihood for a family correction,  $X^2 = 2.94$ ,  $p = 0.13$ . An explanation is that non-research grade  
321 (especially Needs-ID level data) only indicates that the necessary number of experts have not yet  
322 attempted to identify the species or genus level of an observation, but does not say anything about the  
323 accuracy of the record itself.

324 **Table 4. Number of genus and family corrections for research grade and non-research**  
325 **grade observations based on a sample of 1792 species and genus records in the Americas.**

|              | Observations |       | Genus corrections |       | Family corrections |       |
|--------------|--------------|-------|-------------------|-------|--------------------|-------|
|              | Count        | %     | Count             | %     | Count              | %     |
| Research     | 394          | 22.0  | 12                | 15.4  | 3                  | 9.4   |
| Non-research | 1398         | 78.0  | 66                | 84.6  | 29                 | 90.6  |
| Total        | 1792         | 100.0 | 78                | 100.0 | 32                 | 100.0 |

326

## 327 Discussion

328 The first part of the study showed that CS based termite observation data are still a niche product  
329 compared to expert databases and professional collections, such as museum records. Similarly, CS data  
330 did not capture much of termite species diversity. This could be because of the cryptic nature of termites  
331 and their small size, which renders field collection and species detection difficult for non-experts. Results  
332 showed that UFTC clearly outnumbered GBIF and iNaturalist in cumulative species numbers, although in  
333 the most recent years iNaturalist (and in consequence also GBIF) submissions have increased drastically,  
334 pointing towards a more important role of CS for termite observation data collection and mapping. While  
335 GBIF being a data warehouse that draws its data from numerous other data collections, it was shown that  
336 CS based collections play only a marginal role for termites (~1.2 %) in that platform.

337 As of now, CS projects, global data portals that combine many data sources, as well as expert  
338 data collections, inherently come with a spatial and temporal bias, due to the opportunistic nature of CS



339 data, the limited spatial and temporal scope of projects, and socio-economic factors limiting access to the  
340 latest technology in various parts of the world. One study, for example, compared the completeness and  
341 coverage among three open-access databases along ten taxonomic groups, finding that the coverage of  
342 systematic surveys (American Breeding Bird Survey, BBS, and federally administered fish surveys, FFS)  
343 was less biased across spatial and environmental dimensions but more biased in temporal coverage  
344 compared to GBIF data [27].

345         Lack of frequent updates on termite sightings can be considered a lesser problem for modeling  
346 termite species distribution, since the natural dispersal of termite colonies proceeds slowly. Alates  
347 (winged reproductives) are unable to fly more than a few hundred meters from the parent colony [28, 29].  
348 However, occasional anthropogenic means of transportation on water, e.g. by maritime vessels [30, 31] or  
349 on land via infested ornamental timber of wood structures, allows occasional faster dispersion and  
350 establishment of new colonies.

351         Comparison of the world-wide contribution maps (Fig 2) showed distinct geographic biases  
352 between the three analyzed data sources. The focus of the UFTC is on the Americas since this is the  
353 primary study area of the data base creator and manager (RHS). As opposed to this, GBIF shows a strong  
354 contribution bias towards Australia through a large data collection shared by a governmental research  
355 institution (SCIRO). iNaturalist, as the only exclusively CS based platform has its geographic focus on  
356 the U.S., where the program has been founded in 2008. This shows that various factors, such as the  
357 location of individuals or that of individual organizations, as well as the country of where a project has  
358 been founded, will add to geographic contribution bias.

359         Analyzing the presence of genus point data across geographically distinct cells showed that the  
360 UFTC provides the highest number of termite genera that satisfy general data requirements for niche  
361 modelling, following by GBIF and iNaturalist. The combination of UFTC and GBIF increases the number  
362 of genera suitable for niche modeling by up to 95 % compared to single source data, whereas adding  
363 iNaturalist data has only a minor effect.

364           The third part of the study evaluated for a subset of termite records in the Americas the accuracy  
365 of record classifications in iNaturalist. Overall, it can be concluded that the classification quality of  
366 iNaturalist termite data is excellent with error rates up to only 5.1 % for genus designations and 10.2% for  
367 family designations. We found no statistically significant effect of DQA on classification accuracy.

368           Whether research grade records can be considered more trustworthy than non-research grade  
369 observations is important when it comes to species distribution models. This is because non-research  
370 grade termite observations in iNaturalist cover some geographic regions that are missed by research grade  
371 records (Fig 3a). Dropping non-research grade observation would therefore add to the bias of geographic  
372 coverage.

373           Temporal rates of submissions varied between data sources. In particular GBIF records for  
374 termites varied sporadically through the years based on punctuated submissions from professional  
375 expeditions in Mexico and Ghana. This contrasts with larger represented taxa in GBIF like Aves where  
376 professional data sets are rarely submitted and the vast majority of submissions occurs from the CS  
377 platforms [32]. While the GBIF data quality may be higher the sporadic pattern of submissions may add  
378 more noise to analysis than the steadily increasing submission rate that is frequently seen in CS. Such  
379 temporal biases can affect biodiversity models and cloud patterns when interpreting analysis [33].

## 380 **Conclusions**

381           Using termites as an example that can be challenging to collect, we show that expert datasets,  
382 such as the UFTC and GBIF are valuable for biodiversity research because of their number of records,  
383 spatial distributions, and diversity. Especially GBIF, which taps into data from a variety of data sources,  
384 can mitigate knowledge gaps and restraints from individual projects. For termites, the contribution from  
385 CS data is much lower than expert and museum collections due to sampling biases and identification  
386 challenges. However, these CS contributions (particularly using iNaturalist's non-research grade data set)  
387 with some extra quality controls can still be useful in biodiversity studies since they cover otherwise  
388 underexplored areas, such as central Africa or South-East Asia. Combining GBIF, UFTC, and iNaturalist

389 data sets globally creates a more comprehensive picture of termite biodiversity than either of these data  
390 sources on their own.

391 Although crowd-sourced data currently play a small role in termite record numbers relative to  
392 expert or global research databases, they should not be ignored when searching for data to build termite  
393 diversity or distribution maps. More specifically, CS based data collections have the advantage of being  
394 quickly updated, and the many eyes of volunteer contributors may even be able to discover species in  
395 locations where they were not previously observed (Skejo et al. 2016). For example, in the current study,  
396 *Kaloterme*s *approximatus* was identified as a new Texas state record from an iNaturalist photograph that  
397 was identified as an *Incisitermes* sp.

## 398 **References**

- 399 1. Su N-Y. Novel Technologies for Subterranean Termite Control. *Sociobiology*. 2002;39(3):95–101.
- 400 2. Rust MK, Su N-Y. Managing social insects of urban importance. *Annual Review of Entomology*.  
401 2012;57:355-75.
- 402 3. McKinley DC, Miller-Rushing AJ, Ballard HL, Bonney R, Brown H, Cook-Patton SC, et al.  
403 Citizen science can improve conservation science, natural resource management, and  
404 environmental protection. *Biological Conservation*. 2017;208:15-28.
- 405 4. See L, Mooney P, Foody G, Bastin L, Comber A, Estima J, et al. Crowdsourcing, Citizen Science  
406 or Volunteered Geographic Information? The Current State of Crowdsourced Geographic  
407 Information. *ISPRS International Journal of Geo-Information*. 2016;5(5):64.
- 408 5. Scheffrahn RH, Chase JA, Mangold JR, Hochmair HH. Relative occurrence of the family  
409 *Kalotermitidae* (Isoptera) under different termite sampling methods. *Sociobiology*. 2018;65(1):88-  
410 100.
- 411 6. Pereira HM, Ferrier S, Walters M, Geller GN, Jongman RHG, Scholes RJ, et al. Essential  
412 Biodiversity Variables. *Science*. 2013;339(6117):277-8.

- 413 7. Guisan A, Thuiller W. Predicting species distribution: Offering more than simple habitat models.  
414 Ecological Letters. 2005;8:993-1009.
- 415 8. Platts PJ, Ahrends A, Gereau RE, McClean CJ, Lovett JC, Marshall AR, et al. Can distribution  
416 models help refine inventory-based estimates of conservation priority? A case study in the Eastern  
417 Arc forests of Tanzania and Kenya. Diversity and Distributions. 2010;16:628-42.
- 418 9. Bidinger K, Lötters S, Rödder D, Veith M. Species distribution models for the alien invasive  
419 Asian Harlequin ladybird (*Harmonia axyridis*). Journal of Applied Entomology. 2012;136:109-23.
- 420 10. La Sorte FA, Jetz W. Tracking of climatic niche boundaries under recent climate change. Journal  
421 of Animal Ecology. 2012;81:914-25.
- 422 11. Tassarolo G, Rangel TF, Araujo MB, Hortal J. Uncertainty associated with survey design in  
423 Species Distribution Models. Biodiversity Research. 2014;20:1258-69.
- 424 12. Chandler M, See L, Copas K, Bonde AMZ, López BC, Danielsen F, et al. Contribution of citizen  
425 science towards international biodiversity monitoring. Biological Conservation. 2017;213(Part  
426 B):280-94.
- 427 13. Jacobs C, Zipf A. Completeness of citizen science biodiversity data from a volunteered geographic  
428 information perspective. Geo-spatial Information Science. 2017;20(1):3-13.
- 429 14. Goodchild MF. Citizens as Voluntary Sensors: Spatial Data Infrastructure in the World of Web 2.0  
430 (Editorial). International Journal of Spatial Data Infrastructures Research (IJS DIR). 2007;2:24-32.
- 431 15. Scheffrahn RH. UF Termite Data 2019 [10/27/2019]. Available from:  
432 <https://www.termitediversity.org/>.
- 433 16. R Core Team. R: A language and environment for statistical computing: R Foundation for  
434 Statistical Computing; 2019. Available from: <https://www.R-project.org/>.
- 435 17. Barve V, Hart E. rinat: Access iNaturalist Data Through APIs. R package version 0.1.5 2019.  
436 Available from: <https://CRAN.R-project.org/package=rinat>.
- 437 18. iNaturalist. Changes to Quality Grade 2015 [10/7/2019]. Available from:  
438 <https://inaturalist.tumblr.com/post/126691814973/changes-to-quality-grade>.

- 439 19. International Organization for Standardization. Standards Guide: ISO/TC 211 Geographic  
440 Information/Geomatics. 2009.
- 441 20. Gaiji S, Chavan V, Ariño AH, Otegui J, Hobern D, Sood R, et al. Content assessment of the  
442 primary biodiversity data published through GBIF network: Status, challenges and potentials.  
443 Biodiversity Informatics. 2013;8(2).
- 444 21. Chamberlain S, Barve V, Desmet P, Geffert L, Mcglinn D, Oldoni D, et al. rgbif: Interface to the  
445 Global Biodiversity Information Facility API. R package version 1.3.0 2019. Available from:  
446 <https://CRAN.R-project.org/package=rgbif>.
- 447 22. GBIF. Data quality requirements: Occurrence-only datasets 2019 [11/4/2019]. Available from:  
448 <https://www.gbif.org/data-quality-requirements-occurrences>.
- 449 23. Pebesma E. Simple Features for R: StandardizedSupport for Spatial Vector Data. The R Journal.  
450 2018;10(1):439-46.
- 451 24. Pearson RG, Raxworthy CJ, Nakamura M, Peterson AT. Predicting species distributions from  
452 small numbers of occurrence records: a test case using cryptic geckos in Madagascar. Journal of  
453 Biogeography. 2007;34(1):102-17.
- 454 25. Constantino R. Termite Database 2019 [11/4/2019]. Available from: <http://164.41.140.9/catal>.
- 455 26. Tonini F, Hochmair HH, Scheffrahn RH, DeAngelis DL. Stochastic spread models: a comparison  
456 between an individual-based and a cell-based model for assessing the expansion of invasive  
457 termites over a landscape. Environmental Informatics. 2014;24:222–30.
- 458 27. Troia MJ, McManamay RA. Filling in the GAPS: evaluating completeness and coverage of open-  
459 access biodiversity databases in the United States. Ecology and Evolution. 2016;6(14):4654–69.
- 460 28. Husseneder C, Simms DM, Ring DR. Genetic diversity and genotypic differentiation between the  
461 sexes in swarm aggregations decrease inbreeding in the Formosan subterranean termite. Insectes  
462 Sociaux. 2006;53(2):212–9.

- 463 29. Mullins AJ, Messenger MT, Hochmair HH, Tonini F, Su N-Y, Riegel C. Dispersal Flights of the  
464 Formosan Subterranean Termite (*Isoptera: Rhinotermitidae*). *Journal of Economic Entomology*.  
465 2015;108(2):707 - 19.
- 466 30. Hochmair HH, Scheffrahn RH. Spatial Association of Marine Dockage With Land-Borne  
467 Infestations of Invasive Termites (*Isoptera: Rhinotermitidae: Coptotermes*) in Urban South  
468 Florida. *Journal of Economic Entomology*. 2010;103(4):1338-46.
- 469 31. Scheffrahn RH, Crowe W. Ship-Borne Termite (*Isoptera*) Border Interceptions in Australia and  
470 Onboard Infestations in Florida, 1986–2009. *Florida Entomologist*. 2011;94(1):57-63.
- 471 32. Sullivan BL, Aycrigg JL, Barry JH, Bonney RE, Bruns N, Cooper CB, et al. The eBird enterprise:  
472 An integrated approach to development and application of citizen science. *Biological*  
473 *Conservation*. 2014;169(January):31-40.
- 474 33. Boakes EH, McGowan PJK, Fuller RA, Chang-qing D, Clark NE, O'Connor K, et al. Distorted  
475 Views of Biodiversity: Spatial and Temporal Bias in Species Occurrence Data. *PloS Biology*.  
476 2010;8(6):e1000385.
- 477

# GBIF

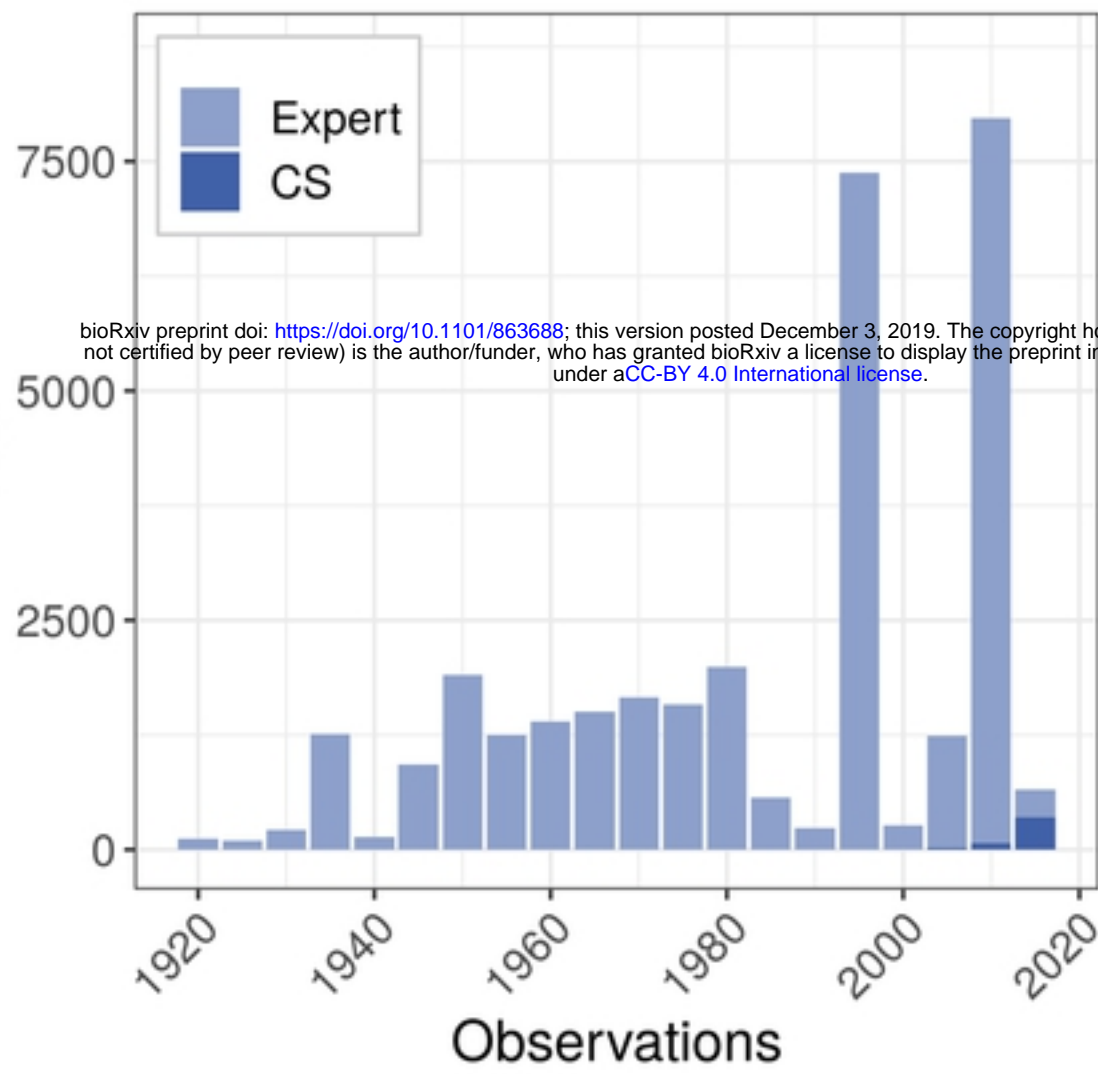

# iNaturalist

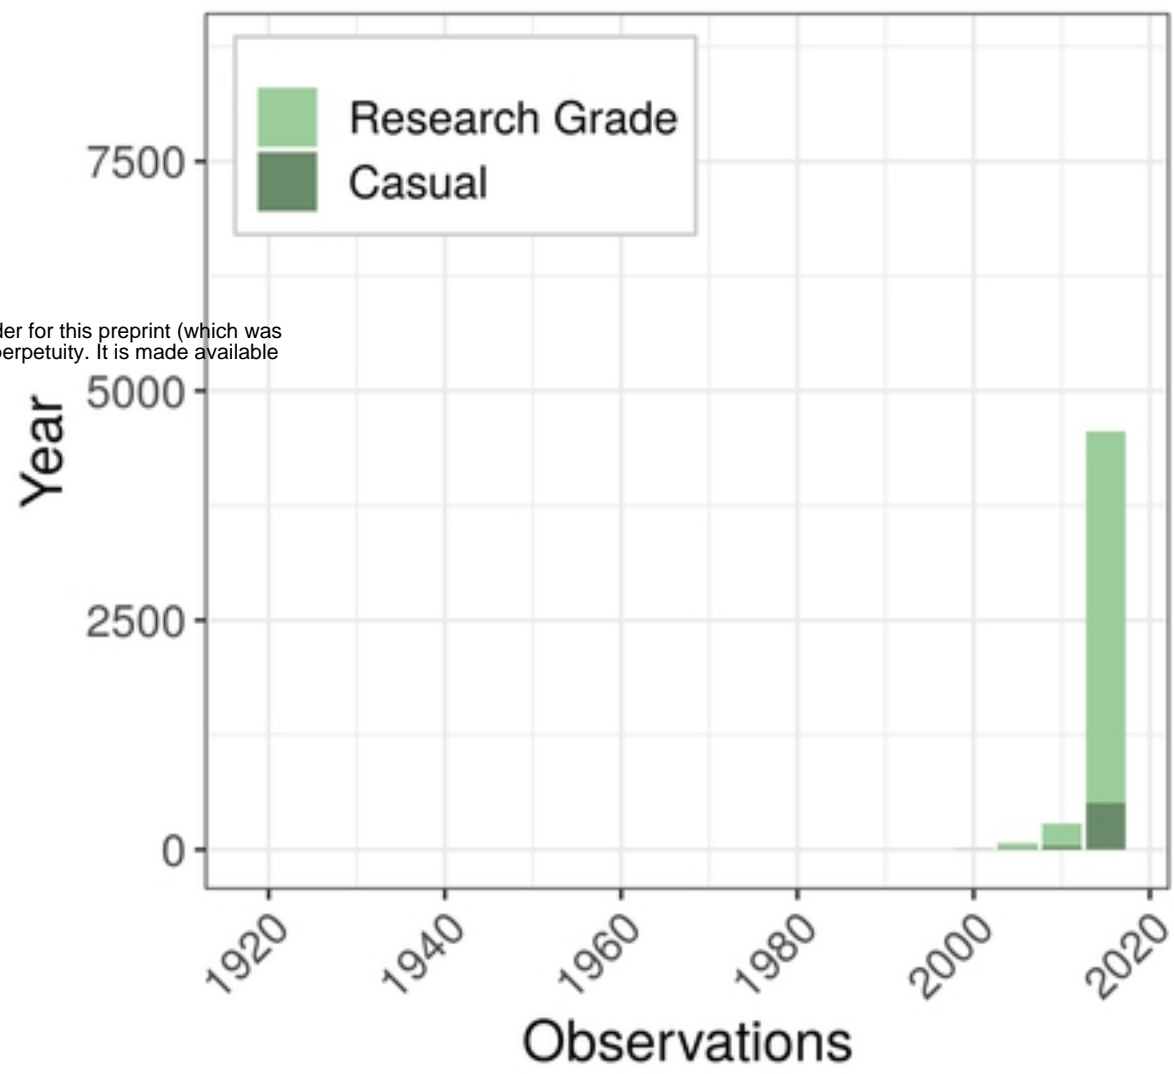

# UFTC

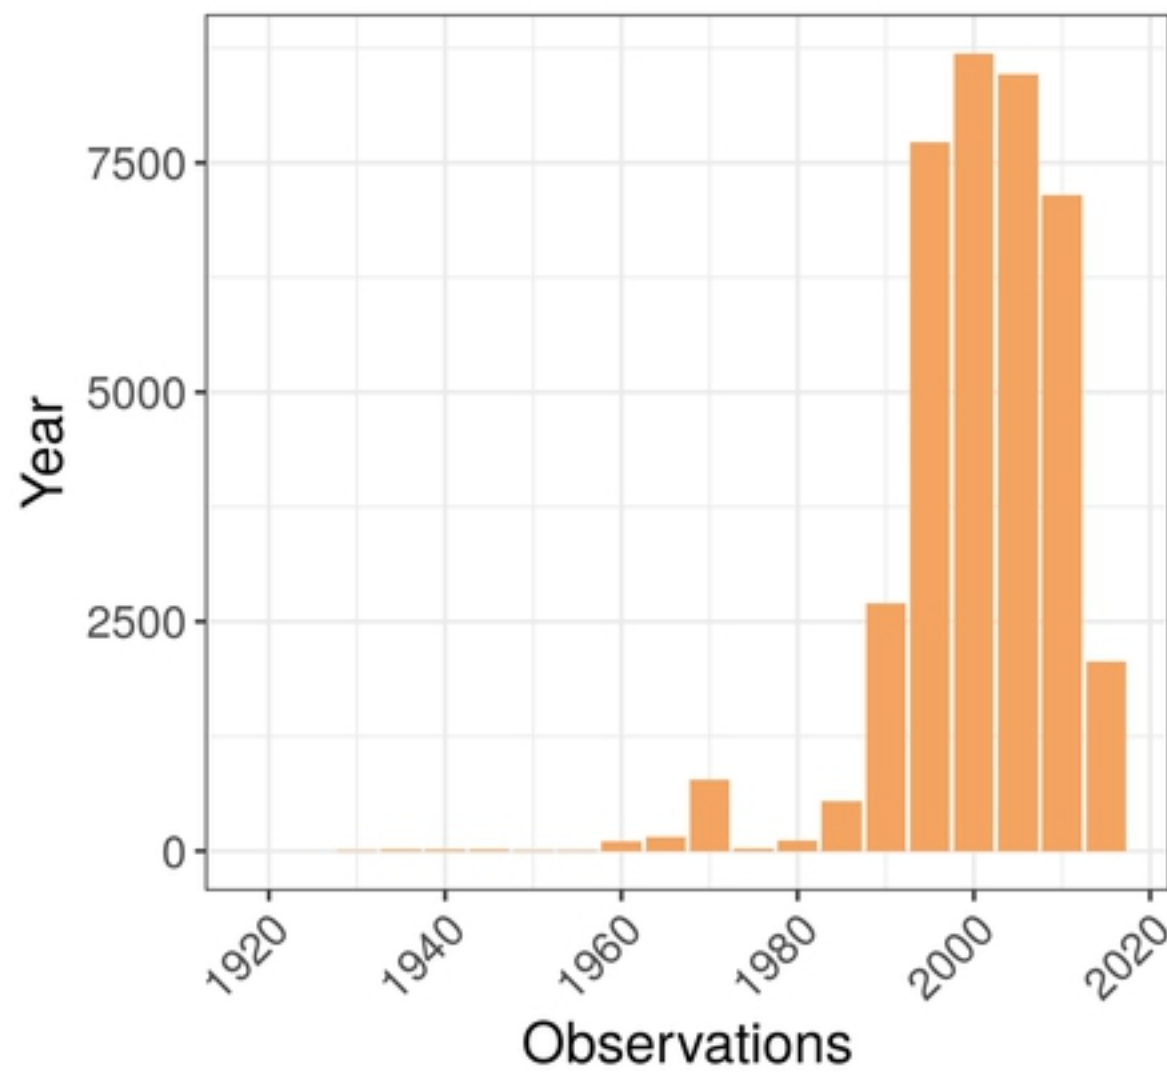

fig. 1

## GBIF Termite Observations

a)

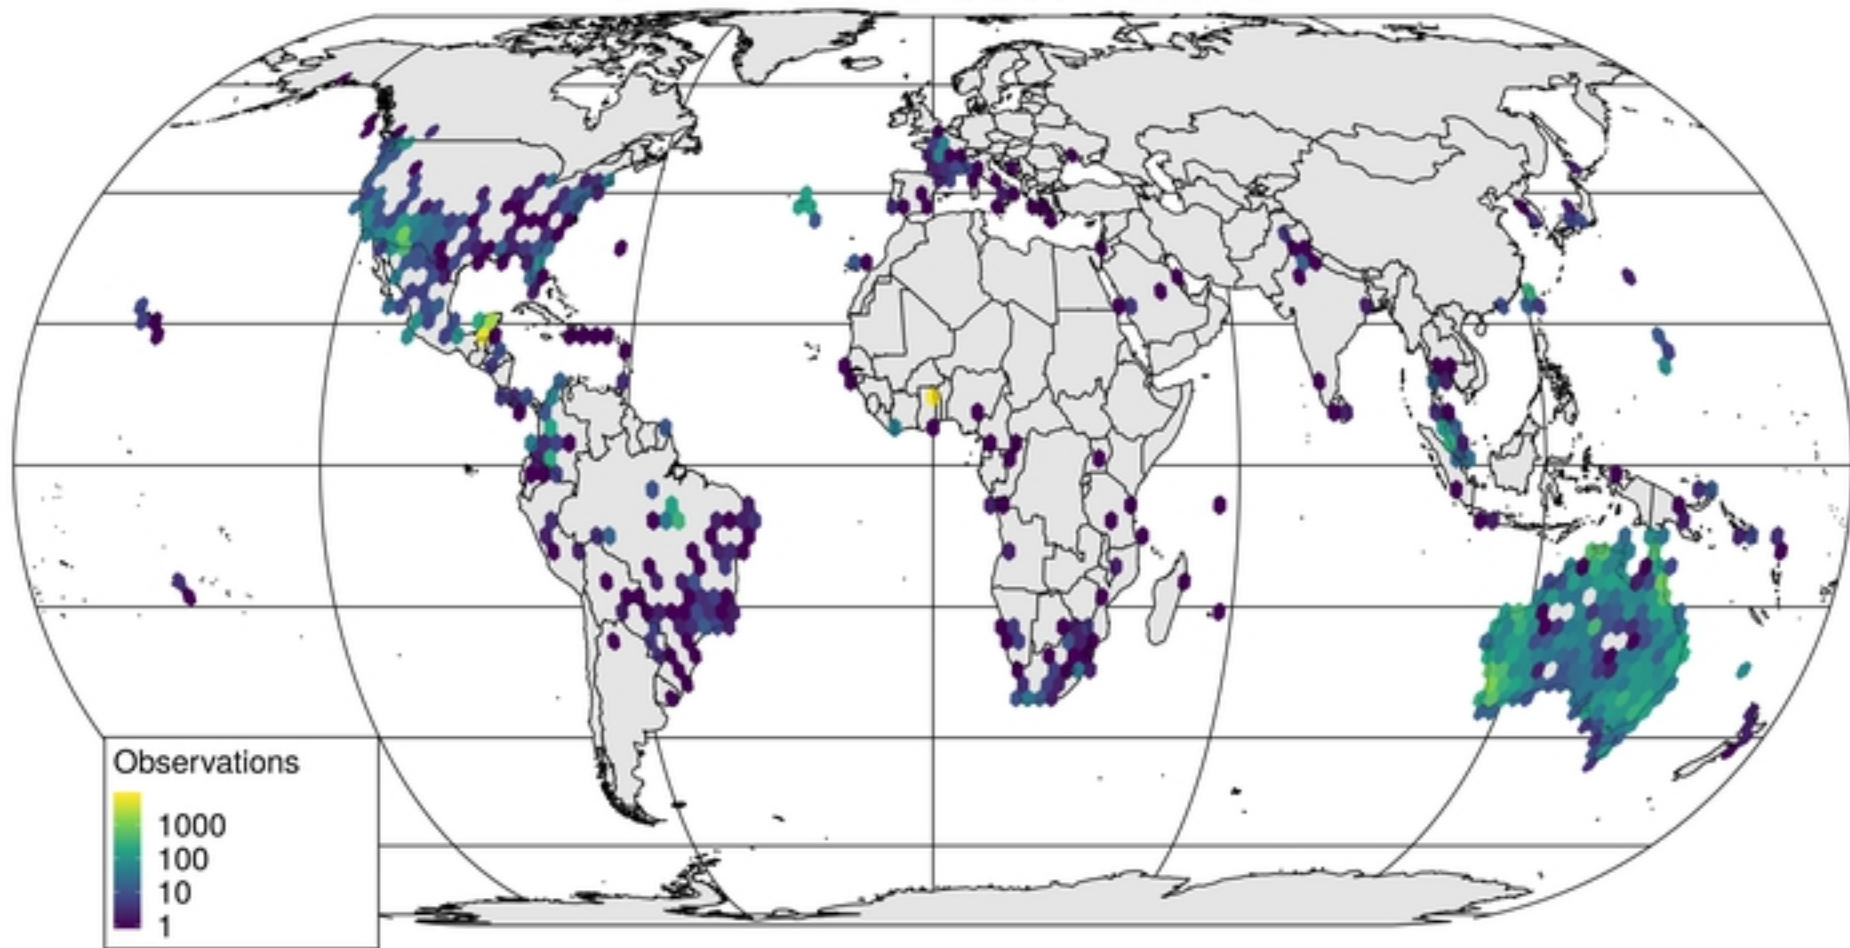

## iNaturalist Termite Observations

bioRxiv preprint doi: <https://doi.org/10.1101/863688>; this version posted December 3, 2019. The copyright holder for this preprint (which was not certified by peer review) is the author/funder, who has granted bioRxiv a license to display the preprint in perpetuity. It is made available under aCC-BY 4.0 International license.

b)

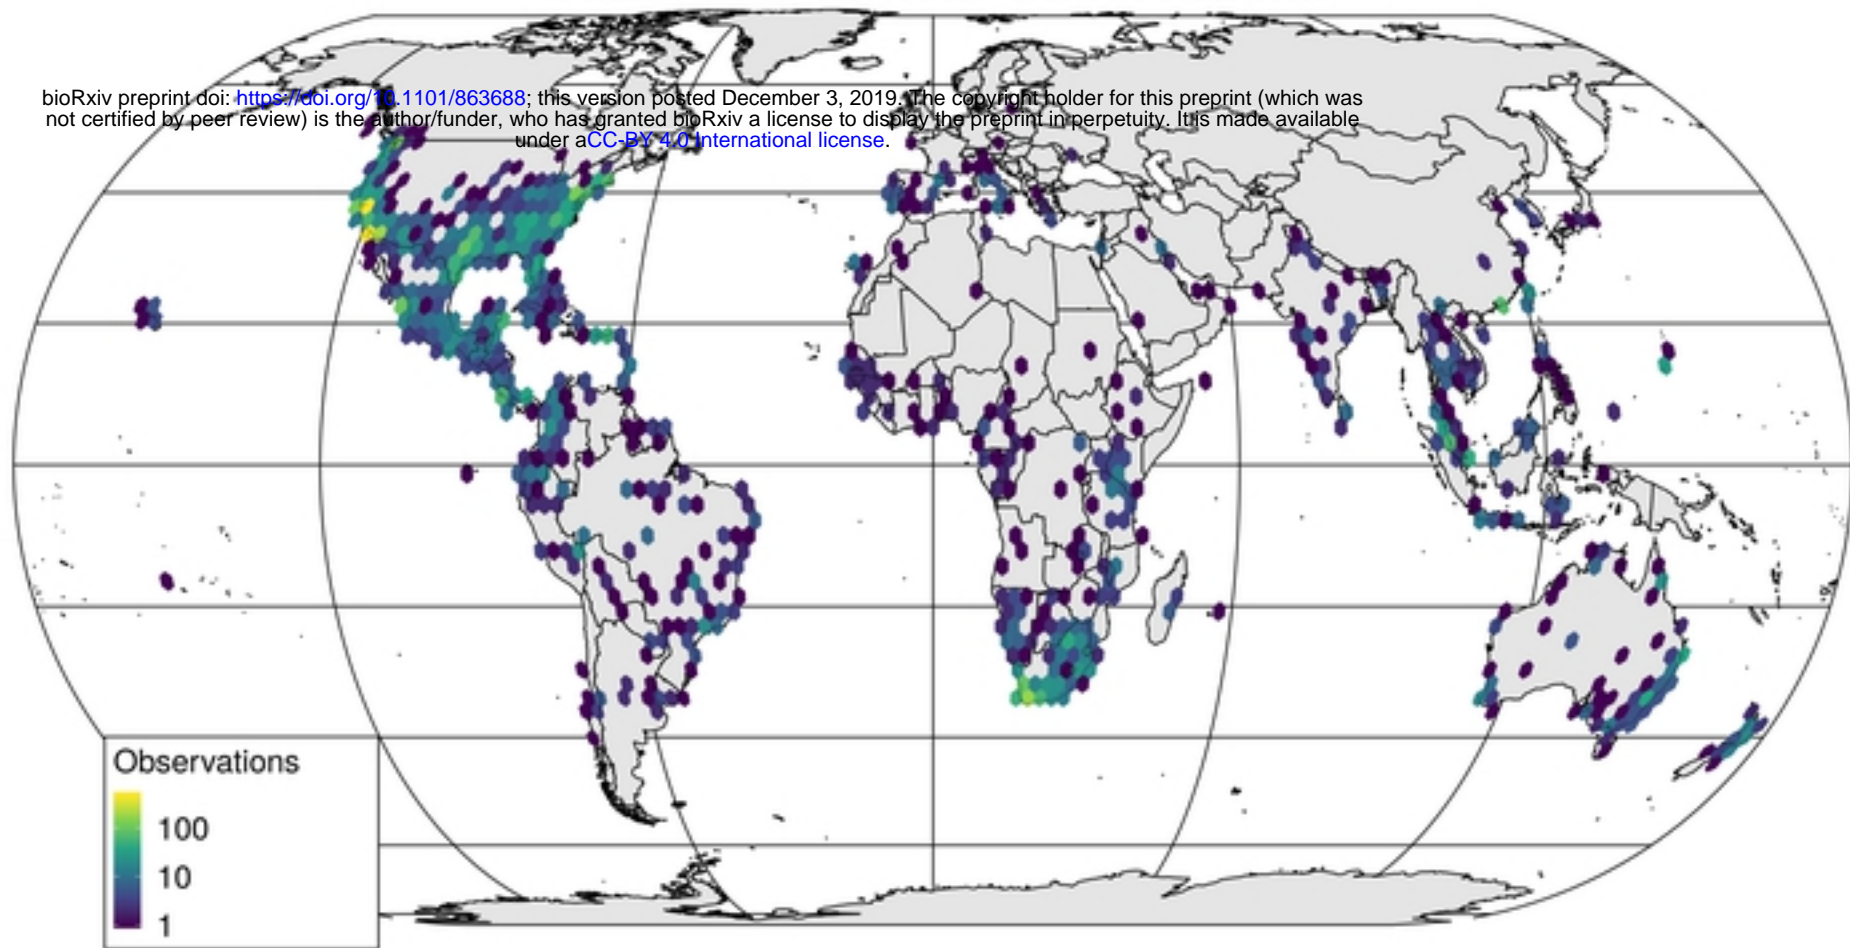

## UF Termite Collection

c)

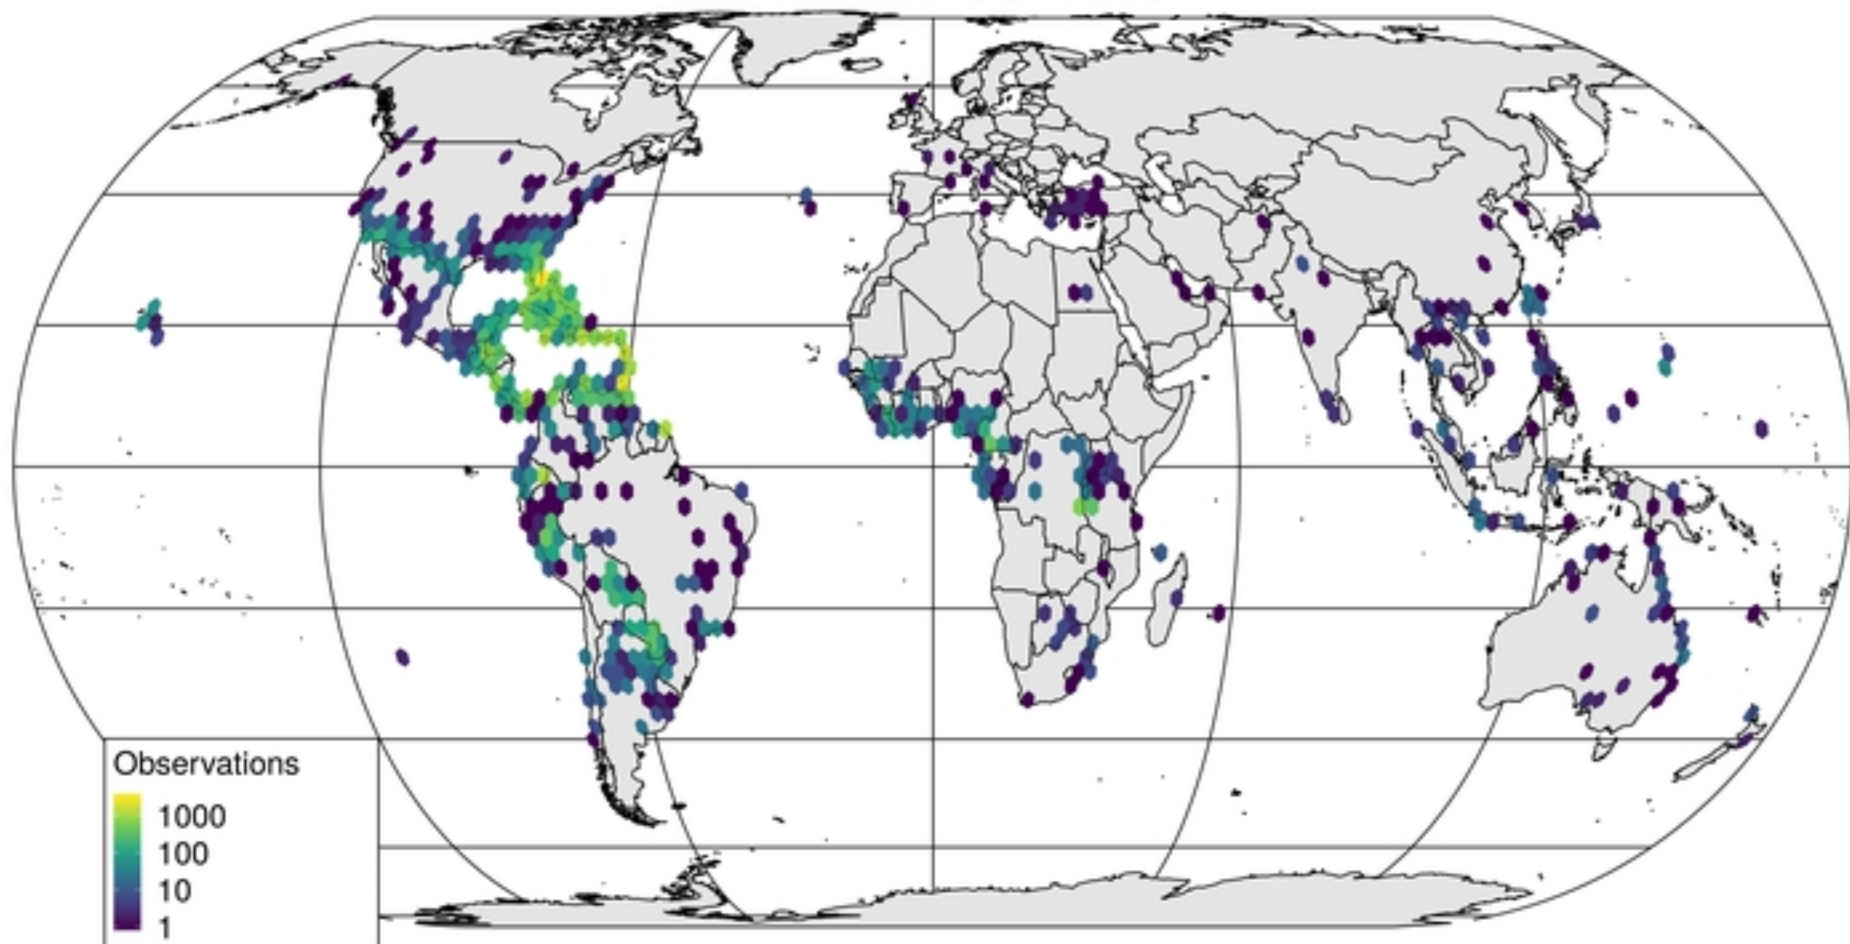

fig. 2



# Global termite species diversity

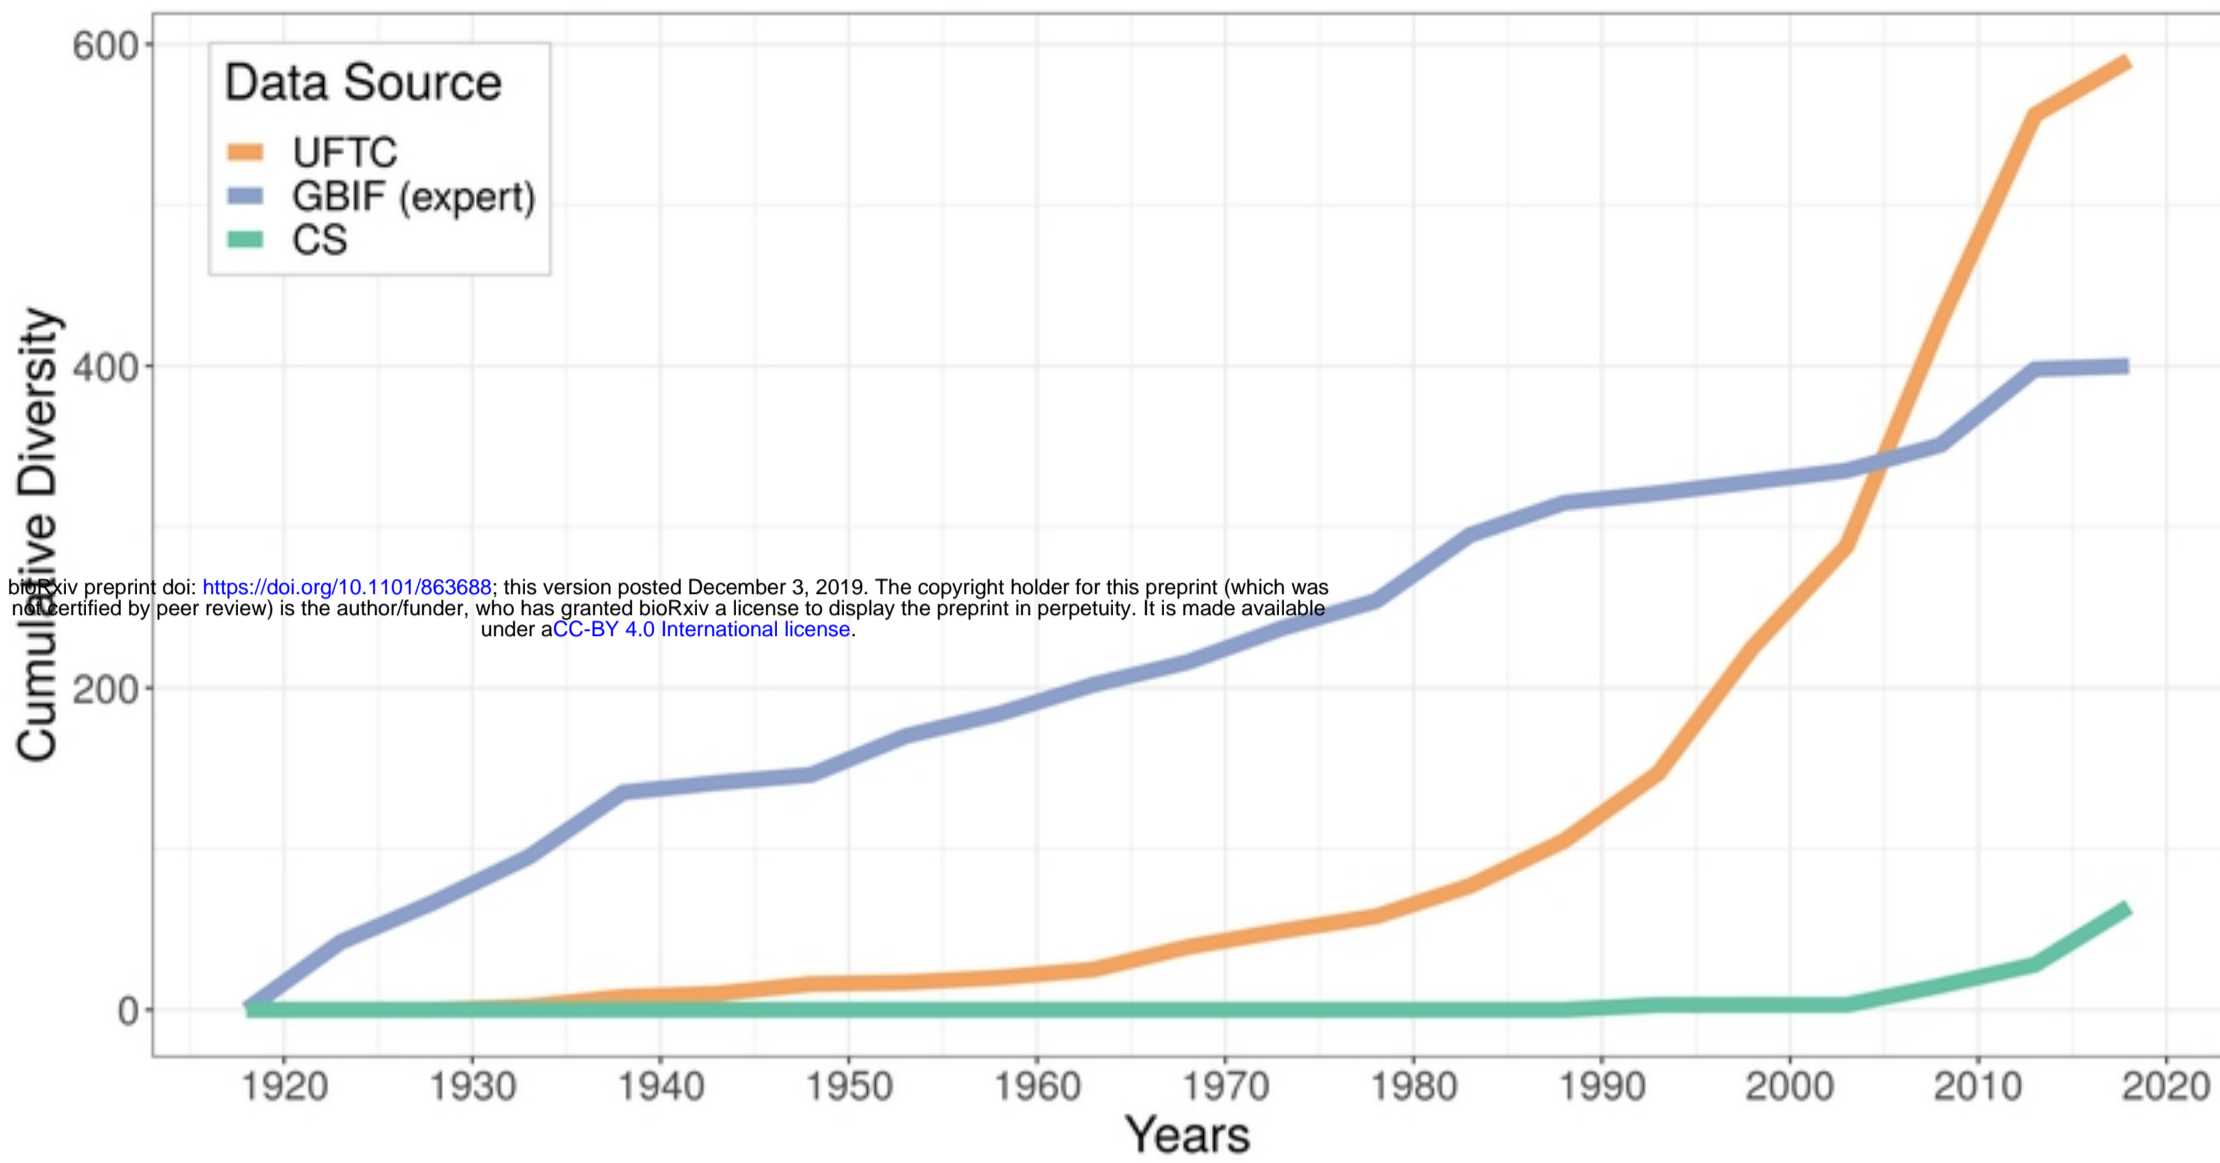

# Termite species diversity in the Americas

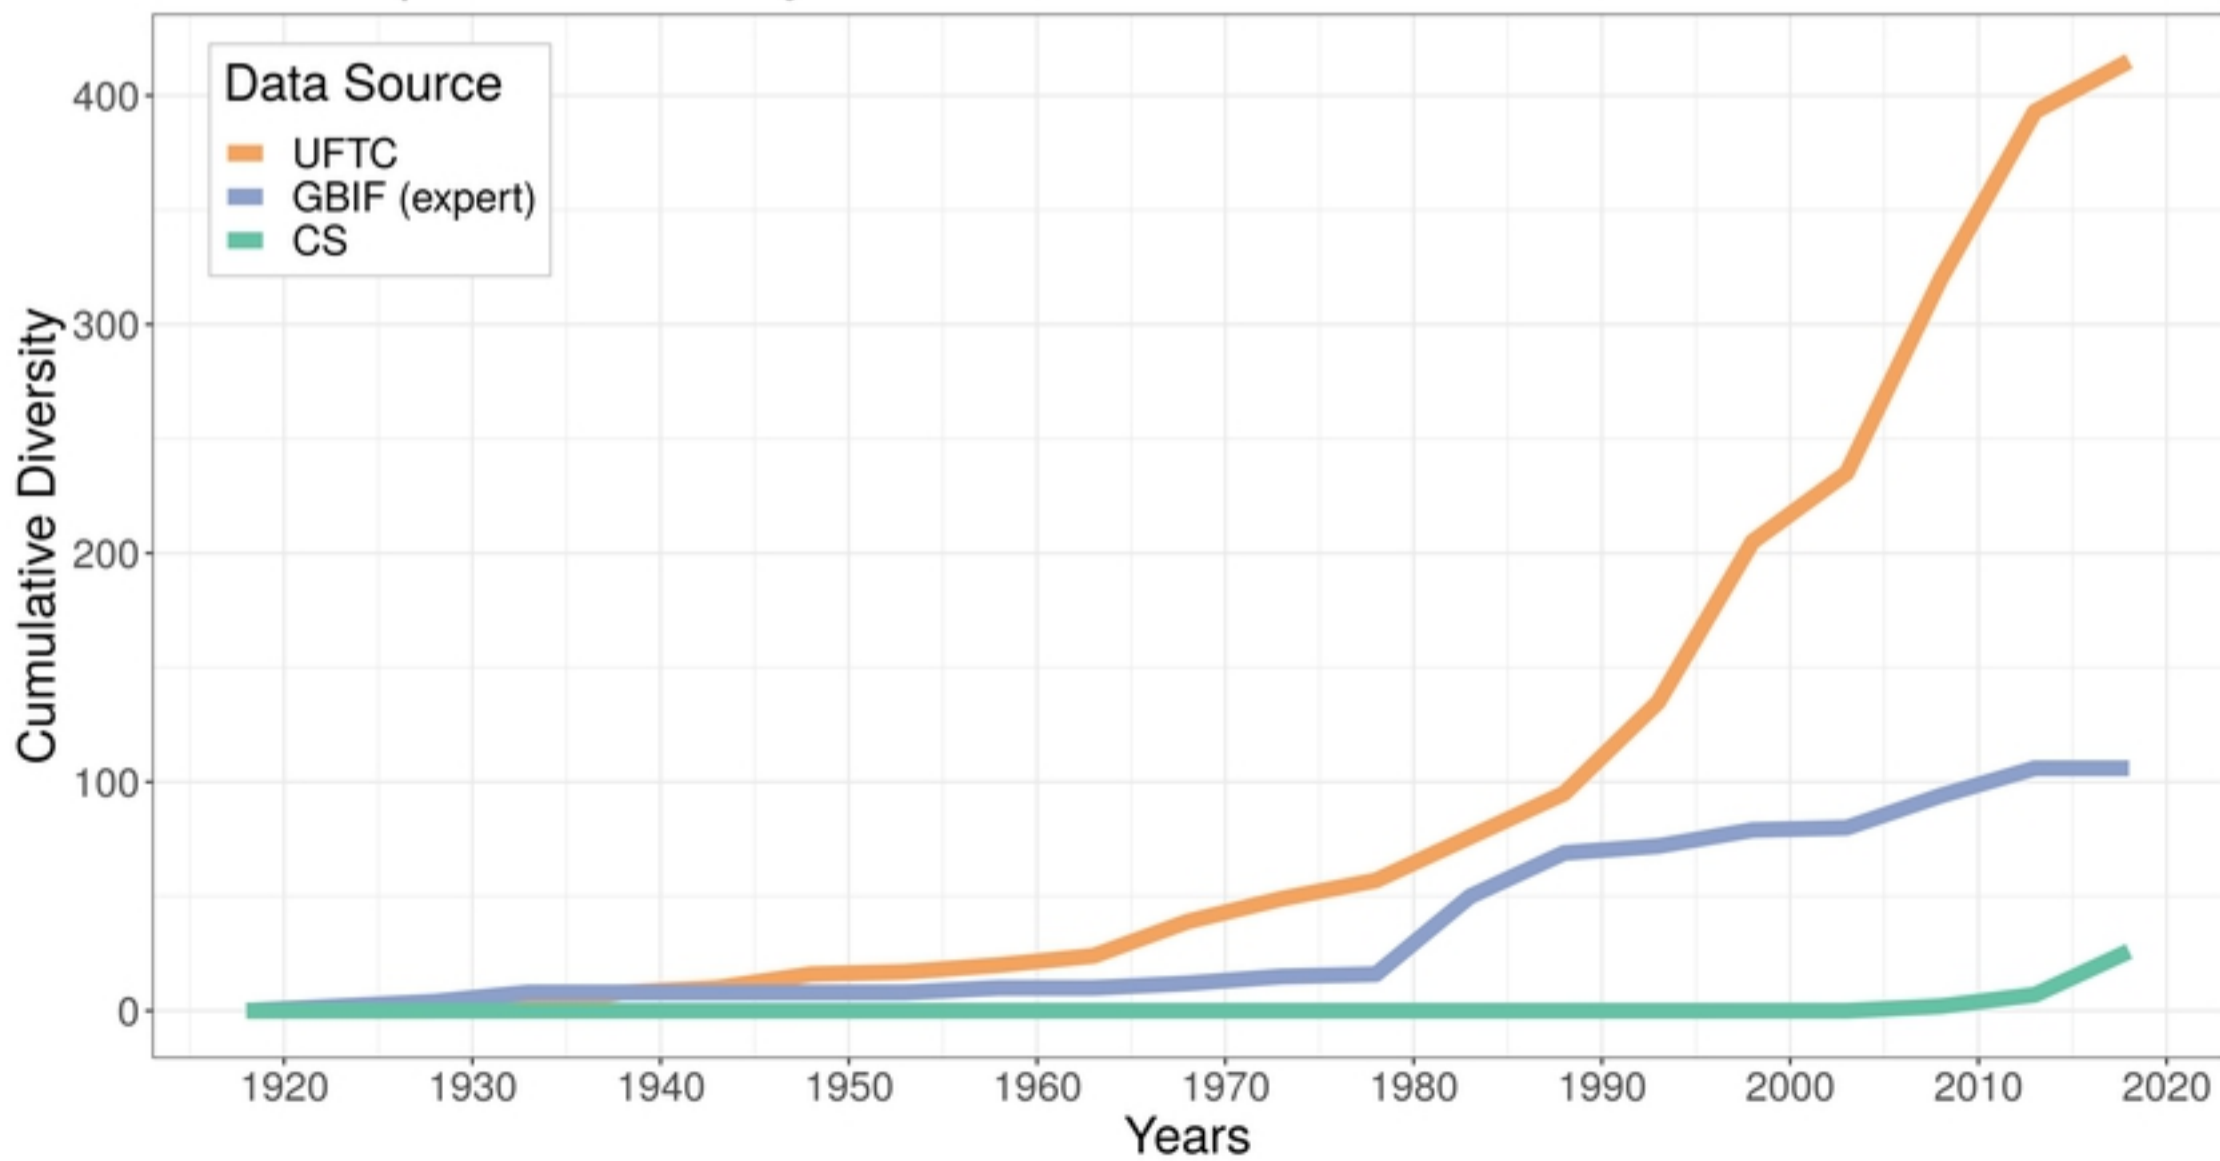

fig. 3

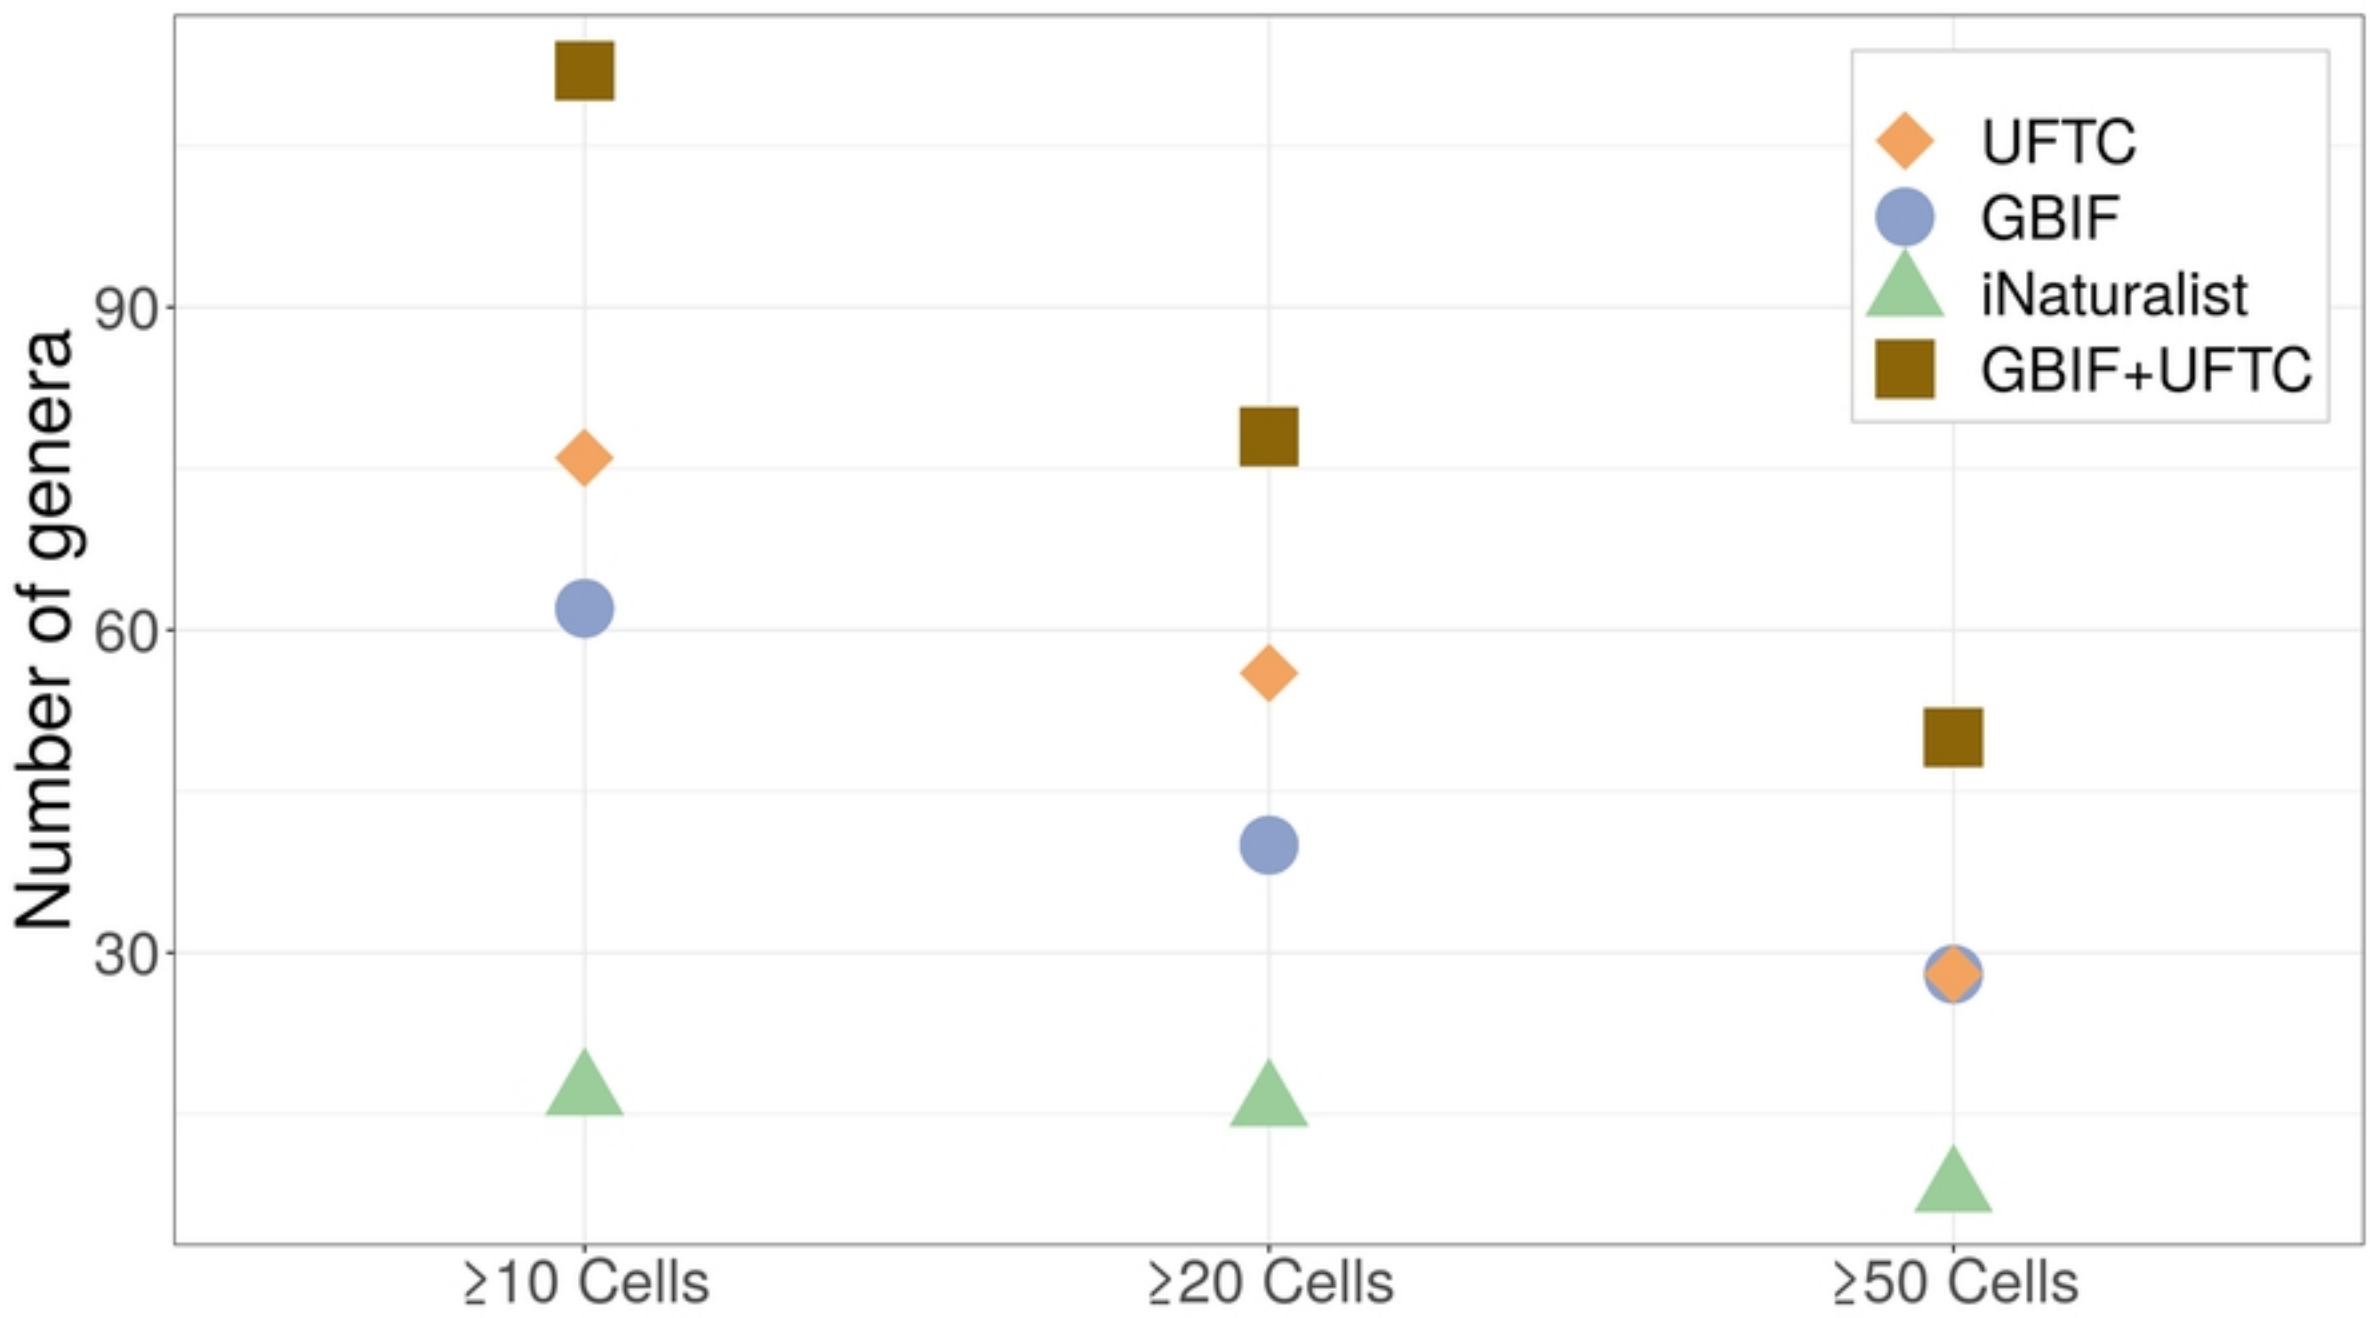

fig. 4

Kalotermitidae

Rhinotermitidae

Archotermopsidae

Termitidae

Kalotermitidae

Rhinotermitidae

Termitidae

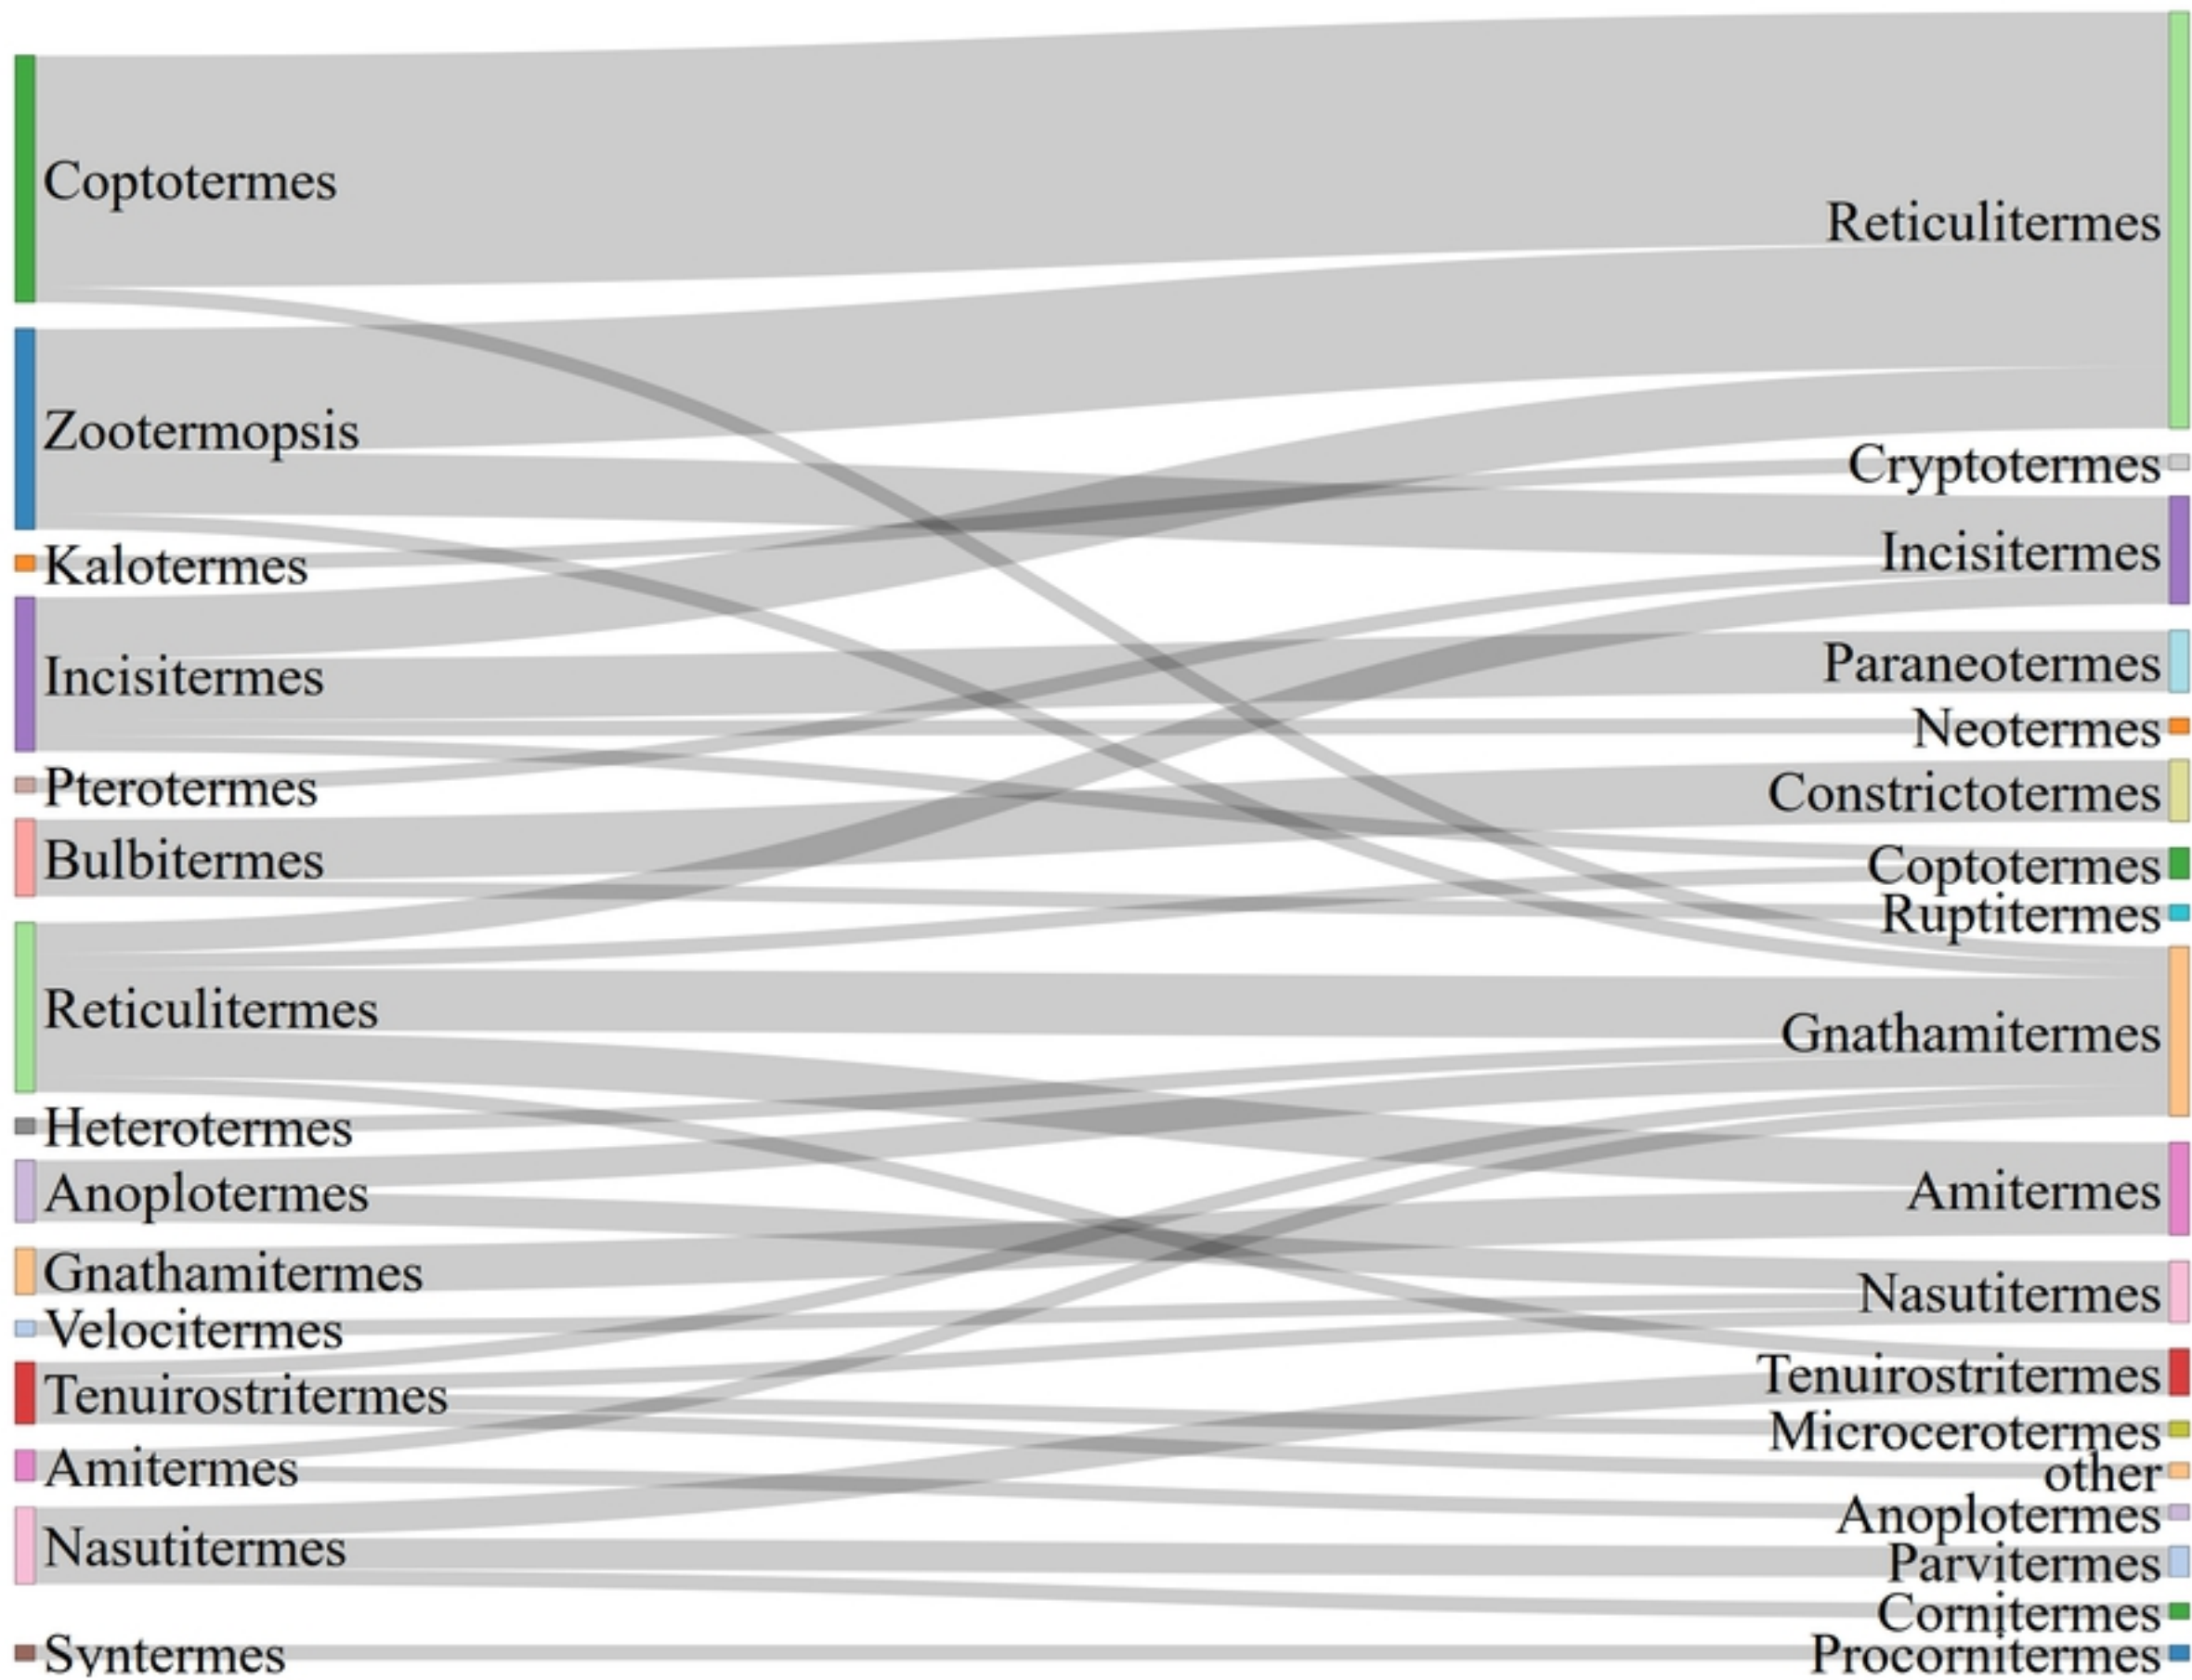

fig. 6

# Coverage of Expert versus CS observations

a)

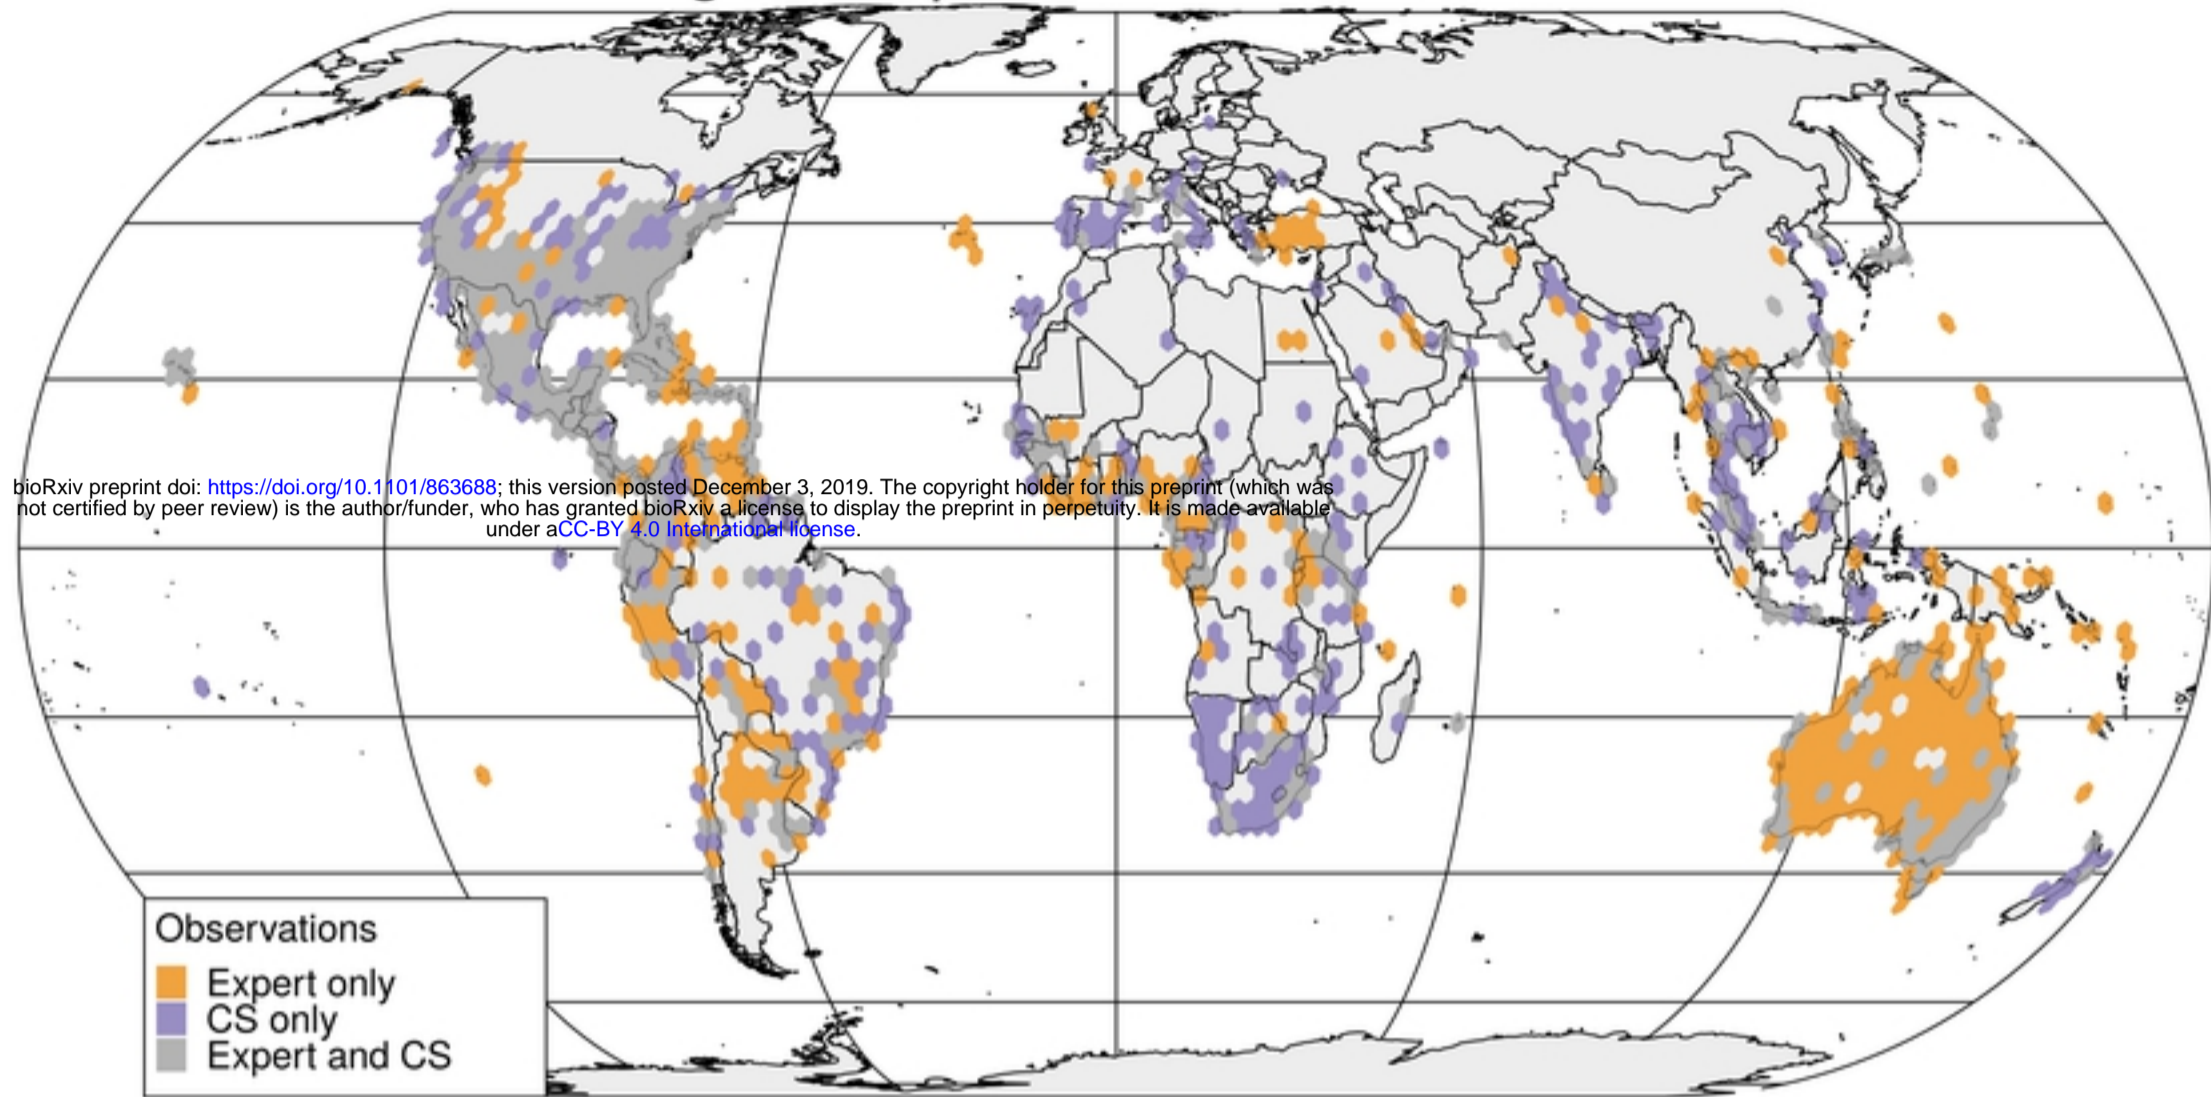

# iNaturalist data coverage

b)

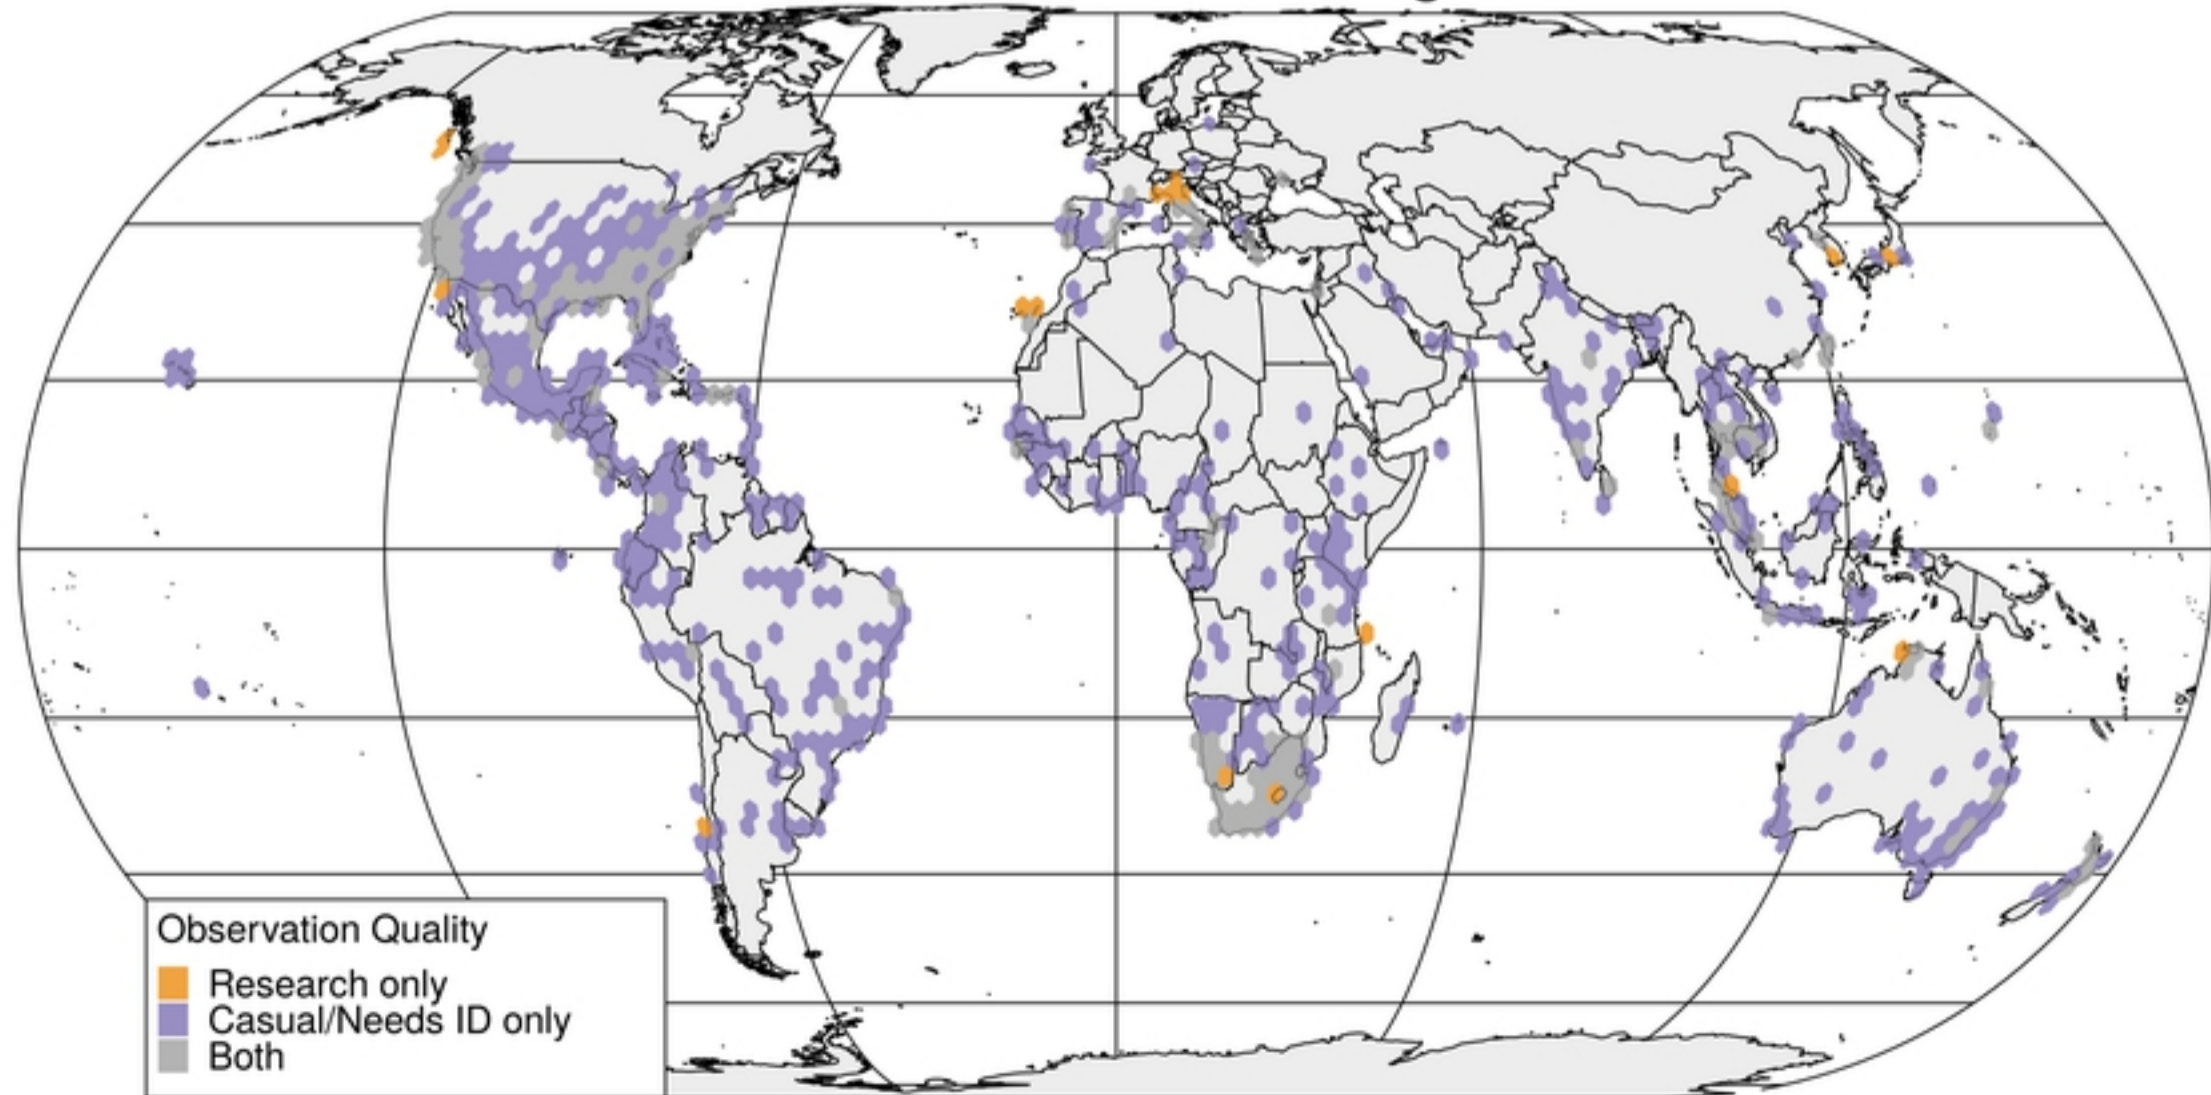

fig. 7
